1 ***Medicago truncatula* ABCG40 is a cytokinin importer negatively regulating lateral root**  
2 **density and nodule number**

3

4 **Tomasz Jamruszka<sup>1</sup>, Joanna Banasiak<sup>1,2</sup>, Aleksandra Pawela<sup>1</sup>, Karolina Jarzyniak<sup>1,2</sup>,**  
5 **Jian Xia<sup>3</sup>, Wanda Biała-Leonhard<sup>1</sup>, Lenka Plačková<sup>4</sup>, Francesca Romana Iacobini<sup>3</sup>,**  
6 **Ondřej Novák<sup>4</sup>, Markus Geisler<sup>3</sup>, Michał Jasiński<sup>1,2</sup> \***

7

8 1. Department of Plant Molecular Physiology, Institute of Bioorganic Chemistry, Polish  
9 Academy of Sciences, Z. Noskowskiego 12/14, 61-704 Poznań, Poland

10 2. Department of Biochemistry and Biotechnology, Poznań University of Life Sciences,  
11 Dojazd 11, 60-632 Poznań, Poland.

12 3. Department of Biology, University of Fribourg, Chemin du Musée 10, CH-1700  
13 Fribourg, Switzerland

14 4. Laboratory of Growth Regulators, Faculty of Science, Palacký University and Institute  
15 of Experimental Botany, The Czech Academy of Sciences, Šlechtitelů 27, CZ-78371,  
16 Olomouc, Czech Republic

17

18 \* For correspondence Michał Jasiński, Department of Plant Molecular Physiology, Institute of  
19 Bioorganic Chemistry, Polish Academy of Sciences, Z. Noskowskiego 12/14, 61-704 Poznań,  
20 Poland, (+48) 61 852 85 03, (e-mail [jasinski@ibch.poznan.pl](mailto:jasinski@ibch.poznan.pl))

21

22 The author responsible for distribution of materials integral to the findings presented in this  
23 article in accordance with the policy described in the Instructions for Authors  
24 (<https://academic.oup.com/plcell/pages/General-Instructions>) is: Michał Jasiński  
25 ([jasinski@ibch.poznan.pl](mailto:jasinski@ibch.poznan.pl)).

26

27 Short title: CK importer affects root morphology

28

29 Key words: ABCG transporters, cytokinin, root morphology, nodulation, lateral root, root  
30 apical meristem

31

32 ORCID IDs

33 Tomasz Jamruszka: 0000-0003-4445-5624

34 Joanna Banasiak: 0000-0002-2834-7116

- 35 Aleksandra Pawela: 0000-0001-5017-4912  
36 Karolina Jarzyniak: 0000-0002-9535-7306  
37 Jian Xia: 0000-0001-9294-7960  
38 Wanda Biała-Leonhard: 0000-0001-8594-2846  
39 Lenka Plačková: 0000-0003-2537-4933  
40 Francesca Romana Iacobini: 0000-0001-8339-6909  
41 Ondřej Novák: 0000-0003-3452-0154  
42 Markus Geisler: 0000-0002-6641-5810  
43 Michał Jasiński: 0000-0003-0904-5873  
44  
45

## 46 **ABSTRACT**

47 Numerous studies suggest a relevant role of cytokinin (CK) distribution in shaping of plant  
48 morphology upon changing environment. Nonetheless, our knowledge about an involvement  
49 of short-distance CK translocation in root mineral nutrition is still scarce and specific role of  
50 CK transporters in root morphology has yet to be established. Revealing the molecular identity  
51 of CK transporters is thereby crucial for better understanding of root plasticity during soil  
52 fertility, as well as more frequently encountered plant nutrients deficiencies. In this work, we  
53 identified and characterized the *Medicago truncatula* full-size ATP-binding cassette (ABC)  
54 transporter belonging to the G subfamily, namely MtABCG40 as a CK importer. Its expression  
55 is root-specific and is induced by nitrogen deprivation and CKs. Our analyses indicate that  
56 MtABCG40 has a negative impact on lateral root density through decreased lateral root  
57 initiation and enhancement of primary root elongation. Moreover, in line with postulated  
58 resemblance to lateral roots, we also observed an inhibitory influence of this transporter on  
59 nodule number. Our results suggest that MtABCG40 action affects CK signaling which impacts  
60 on the cellular response to auxin. We present data that demonstrate a full-size ABCG transporter  
61 with a novel function in legumes and CK transport.

62

## 63 **INTRODUCTION**

64 Plant roots show high plasticity to meet the needs during fluctuations of nitrogen availability in  
65 the soil and can adapt both their physiology and morphology, accordingly. Changes of root  
66 physiology are controlled by the production and translocation of various signaling molecules.  
67 Those include phytohormones, such as cytokinins (CKs), that can have local effects or trigger  
68 a systemic response. Both alter root morphology together with nitrogen uptake from the soil  
69 (Jia and von Wiren, 2020). Adjustment of the primary root length and lateral root number,  
70 manifested often by changes in lateral root density, are two of the plant reactions to varying  
71 nitrogen concentrations (Lopez-Bucio et al., 2003; Lima et al., 2010; Postma et al., 2014). An  
72 increase of the distance between adjacent lateral roots, called lateral root spacing, is triggered  
73 by different factors, especially CKs, which suppress a positive effect of auxin on lateral root  
74 initiation (Laplaze et al., 2007). The spacing results also from CKs influence on the root apical  
75 meristem (RAM), decreasing its size thus decelerating root growth (Dello Ioio et al., 2007;  
76 Dello Ioio et al., 2008). In legumes, a change in root morphology during nitrogen deficiency  
77 can also result from an interaction with symbiotic partners, namely nitrogen-fixing soil bacteria  
78 collectively called rhizobia. The latter induce cortical cell divisions to form root nodules  
79 (Oldroyd et al., 2011). Notably, CKs in legumes control the initial steps of nodule formation by

80 promoting cell proliferation in the cortex giving rise to nodule primordia (Gonzalez-Rizzo et  
81 al., 2006; Murray et al., 2007). However, they can act also as negative regulators of nodulation  
82 by inhibition of further infections in the epidermis (Miri et al., 2019) and systemic suppression  
83 of primordium formation (Sasaki et al., 2014). Of note, CK action in lateral root and nodule  
84 organogenesis is highly dependent on plant nitrogen status (Gu et al., 2018).

85 Aliphatic CKs are adenine derivatives with isoprenoid substitutions at the N<sup>6</sup> position.  
86 Ribosides, their biologically inactive forms, feature more complex structures with an additional  
87 ribose moiety, and are translocated along the plant within vascular tissues (Kieber and Schaller,  
88 2014; Osugi et al., 2017). The cleavage of the sugar component from CK riboside 5'-  
89 monophosphates by LONELY GUY (LOG) enzymes leads to the formation of their active  
90 forms, isopentenyladenine (iP) or *trans*-zeatin (*tZ*) (Kurakawa et al., 2007). To trigger specific  
91 outcomes, CKs have to be translocated across biological membranes and perceived, either  
92 intracellularly or extracellularly (Romanov et al., 2018).

93 Up to date, several CK transporters with functions in roots have been described. Three  
94 of them, namely MtABCG56, AtABCG14, and OsABCG18, belong to the G subfamily of ATP-  
95 BINDING CASSETTE (ABC) family of transporters (Ko et al., 2014; Zhang et al., 2014; Zhao  
96 et al., 2019; Jarzyniak et al., 2021). ABCG transporters in general translocate molecules (both  
97 as an exporters and importers) across biological membranes using ATP as a source of energy.  
98 Their action has been assigned to different developmental processes, reactions to abiotic  
99 stresses, interactions with pathogens, and symbiotic associations (Lefevre and Boutry, 2018).  
100 These also involve translocation of other phytohormones, like strigolactones (Kretzschmar et  
101 al., 2012; Banasiak et al., 2020) and abscisic acid (ABA) (Kang et al., 2010; Pawela et al.,  
102 2019). To date, the only CK transporter implicated in nodulation, MtABCG56, is localized to  
103 the plasma membrane (PM) and transports *tZ* as well as iP. MtABCG56 exports CK from  
104 rhizodermal and cortical cells after perception of symbiotic bacteria-derived Nod factors in the  
105 root susceptible zone (Jarzyniak et al., 2021). On the other hand, *ABCG14* from non-symbiotic  
106 *A. thaliana* is expressed mainly in the pericycle and vasculature of the root along with CK  
107 biosynthesis genes, like *ISOPENTENYLTRANSFERASE 3 (IPT3)* and *CYTOCHROME P450*  
108 *(CYP) MONOOXYGENASES*. AtABCG14 is a PM *tZ*-type CK efflux pump, which contributes  
109 to their long-distance translocation throughout xylem and subsequent systemic impact on plant  
110 development (Ko et al., 2014; Zhang et al., 2014). Notably, a similar function was later  
111 demonstrated for its ortholog from *Oryza sativa*, OsABCG8 (Zhao et al., 2019).

112 Other CK transporters known to function in roots belong to the PURINE PERMEASE  
113 (PUP), AZA-GUANINE RESISTANCE (AZG) and EQUILBRATIVE NUCLEOSIDE

114 TRANSPORTER (ENT) families. AtPUP14 is a PM importer of bioactive CKs (*tZ*, *iP* and 6-  
115 benzylaminopurine 6-BAP) in Arabidopsis seedlings, specifically in their root tip meristematic  
116 cells and lateral root primordia. PUP14 action creates a sink for CKs inside the cell that the  
117 hormone can no longer be perceived in the apoplast by PM-bound receptors and trigger a  
118 specific cell response. Loss of PUP14 transport activity leads to root morphological defects  
119 (Zurcher et al., 2016). AtAZG2, which localizes to the PM and endoplasmic reticulum (ER) of  
120 root cells, transports *iP*, *tZ*, 6-BAP and kinetin. *AtAZG2* is expressed in tissues overlaying  
121 lateral root primordia and, as opposed to auxin, negatively influences lateral root emergence  
122 (Tessi et al., 2021). Finally, AtENT3 translocates CK nucleotides through the PMs of root  
123 vascular bundles and in the root tip, enabling systemic movement of the hormone throughout  
124 the plant, affecting its development (Traub et al., 2007; Cornelius et al., 2012; Korobova et al.,  
125 2021).

126 Here we identify and characterize the *Medicago truncatula* full-size ABCG transporter,  
127 MtABCG40, as a CK importer. *MtABCG40* expression is root-specific and is induced by  
128 nitrogen deprivation and CKs. Our analyses indicate that MtABCG40 has a negative impact on  
129 lateral root density through decreased lateral root initiation and enhancement of primary root  
130 elongation. Moreover, lack of this transporter leads to increased nodule number. Our results  
131 suggest that MtABCG40 action affects CK signaling which impacts on the cellular response to  
132 auxin.

133

## 134 RESULTS

135

### 136 Lateral root density is negatively regulated by MtABCG40 in response to environmental 137 and internal cues

138 *MtABCG40* (*Medtr7g098300*) encodes a full-size ABC transporter belonging to a legume-  
139 specific clade of the G subfamily (Banasiak and Jasiński, 2014; Jarzyniak et al., 2021). High  
140 expression of *MtABCG40* in the root prompted us to determine a possible role of the encoded  
141 transporter in this organ (Figure 1A). Due to a reported multifaceted influence of environmental  
142 stimuli, such as nutrients and, in particular, nitrogen status, on root morphology, we investigated  
143 *MtABCG40* expression at different concentrations of ammonium nitrate (NH<sub>4</sub>NO<sub>3</sub>). We noted  
144 that plants grown on solid media not supplemented with nitrogen (here referred to as 0 mM  
145 NH<sub>4</sub>NO<sub>3</sub>) exhibited the highest *MtABCG40* expression and the lowest lateral root density,  
146 compared to media with added NH<sub>4</sub>NO<sub>3</sub> (Figure 1B). The decline in the lateral root density,  
147 resulting from an enlargement of a spacing between adjacent lateral roots, was a consequence

148 of an acceleration of primary root elongation, and to a lesser extent of a decrease in the lateral  
 149 root number (Supplemental Figure S1). We also investigated a possible relation between the  
 150 *MtABCG40* expression and lateral root density upon treatment with hormones known to trigger  
 151 changes in root architecture, such as ABA and CKs. *MtABCG40* mRNA abundance decreased  
 152 after ABA treatment which was associated with increased lateral root density, while application  
 153 of 6-BAP, a synthetic CK, resulted in an induction of *MtABCG40* expression accompanied by  
 154 a decline in lateral root density (Figure 1, C and D).  
 155

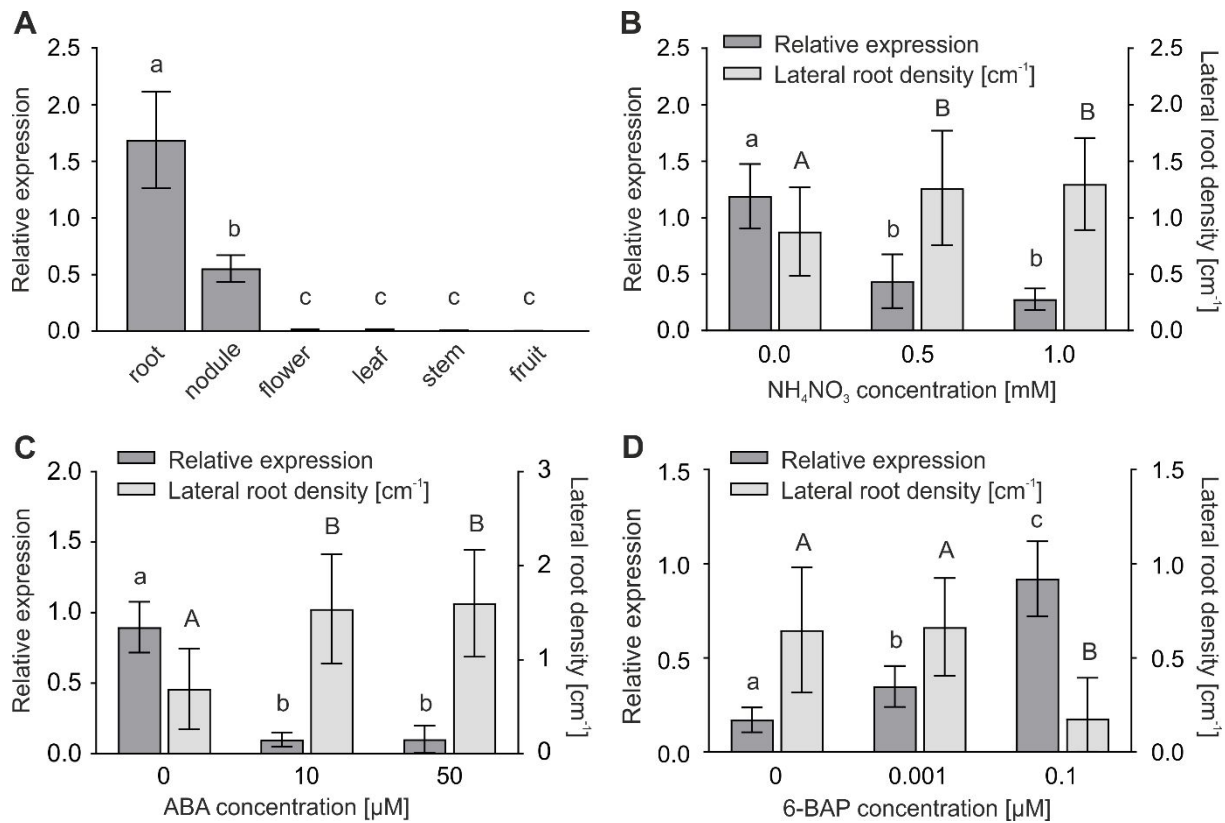

156

157 **Figure 1.** A negative relationship exists between *MtABCG40* expression and lateral root density. A,  
 158 *MtABCG40* transcripts were detected only in roots and nodules. B-D, Expression of *MtABCG40* and  
 159 lateral root density at different concentrations of ammonium nitrate ( $\text{NH}_4\text{NO}_3$ ) (B), abscisic acid (ABA)  
 160 (C), and 6-benzylaminopurine (6-BAP) (D). Transcript levels were measured by quantitative real-time  
 161 PCR and normalized to *actin*. Expression data represent the mean  $\pm$  SD of three independent biological  
 162 experiments and two or three technical repeats. Identical or different lowercase letters indicate no or  
 163 significant differences in the expression, respectively;  $P < 0.05$  (A-D). Significant differences from the  
 164 control plants determined by the one-way ANOVA with a post hoc Tukey's multiple comparison test  
 165 (A, B and D), Kruskal-Wallis test with a post hoc Dunn's multiple comparison test (C). The lateral root  
 166 density data represent the mean  $\pm$  SD of 3 independent biological experiments (31-69 roots per  
 167 condition). Identical or different uppercase letters indicate no or significant differences in the lateral root  
 168 density, respectively;  $P < 0.05$  (B-D). Significant differences from the control plants determined by the  
 169 one-way ANOVA with a post hoc Tukey's multiple comparison test (B), Kruskal-Wallis test with a  
 170 post hoc Dunn's multiple comparison test (C and D).  
 171

172 Two *M. truncatula* lines with tobacco retrotransposon (*Tnt1*) insertions in the 22<sup>nd</sup> exon  
 173 (NF21323, *mtabcg40-1*) and first intron (NF17891, *mtabcg40-2*) of *MtABCG40* were identified  
 174 (Supplemental Figure S2). When grown on nitrogen-depleted media, the mutants, in  
 175 comparison to WT plants, exhibited a significant increase in lateral root density, which could  
 176 indicate a negative influence of *MtABCG40* on this trait (Figure 2A). The phenotype was due  
 177 to a reduction in the root length (Figure 2B) and an increase in the lateral root number (Figure  
 178 2C). Notably, observed differences were less pronounced when nitrogen was present in the  
 179 media (1 mM NH<sub>4</sub>NO<sub>3</sub>) (Supplemental Figure S3).

180  
 181

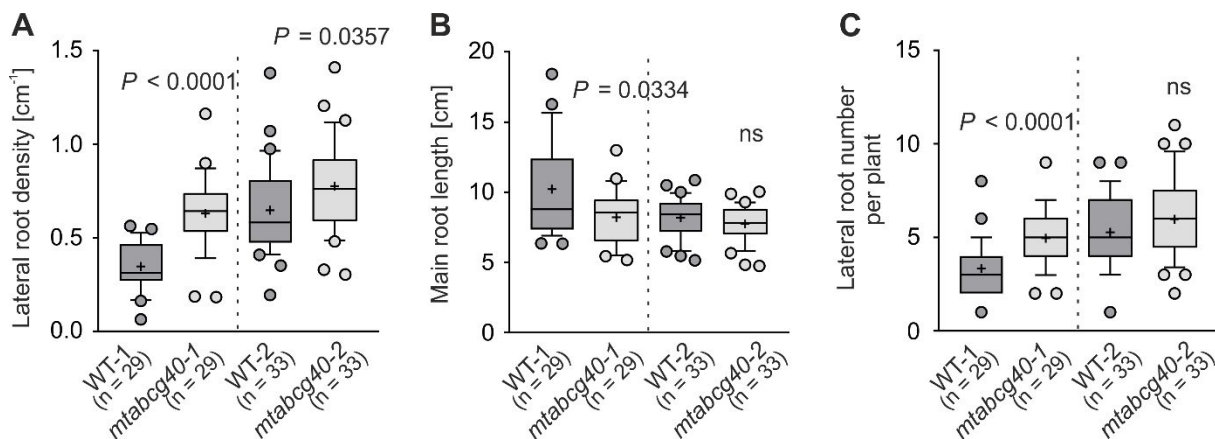

182  
 183

184 **Figure 2.** Mutation of *MtABCG40* increases lateral root density by reducing the primary root length and  
 185 promoting lateral root formation. Lateral root density (A), primary root length (B), and lateral root  
 186 number (C) in control (WT) and mutant (*mtabcg40*) plants. For each box-and-whiskers plot: the central  
 187 black line represents the median; '+' represents the mean; the box extends from the 25th to 75th  
 188 percentiles; the whiskers are drawn down to the 10th percentile and up to the 90th. Points below and  
 189 above the whiskers are drawn as individual dots. Significant differences from the control plants  
 190 determined by two-tailed Student's t-test with Welch correction (A), two-tailed Mann–Whitney test (B  
 191 and C); ns, not significant; n represents the number of individual plants obtained from three independent  
 192 biological experiments (A-C).

193

## 194 **MtABCG40 is a plasma membrane cytokinin importer**

195 Since 6-BAP treatment induced *MtABCG40* expression (Figure 1D), and given its close  
 196 phylogenetic relationship to the previously described CK transporter, MtABCG56  
 197 (Supplemental Figure S4) (Jarzyniak et al., 2021), we decided to study the possible role of  
 198 MtABCG40 in CK translocation. Initially, in addition to 6-BAP, we tested the effect of other  
 199 CKs on the *MtABCG40* expression, and observed that the biologically active CKs, iP and *tZ*,  
 200 induced *MtABCG40* mRNA accumulation in roots (Figure 3, A and B).

201 To demonstrate the direct involvement of MtABCG40 in the translocation of CKs,  
 202 transport experiments with <sup>14</sup>C-labelled *tZ* were carried out. First, we expressed *GFP-*  
 203 *MtABCG40* under the control of the *AtUBI10* promoter in tobacco protoplasts using

204 Agrobacterium-mediated leaf infiltration and showed the PM localization of MtABCG40  
205 (Figure 3C). Subsequently, protoplasts isolated from the transformed leaves were loaded with  
206  $^{14}\text{C}$ -*tZ* and *tZ* export was determined by separating protoplasts from supernatants. Protoplasts  
207 expressing *GFP-MtABCG40* exported less  $^{14}\text{C}$ -*tZ* than the vector control (Figure 3D).  $^{14}\text{C}$ -*tZ*  
208 export catalyzed by GFP-MtABCG40 was specific as the diffusion control, auxin (indole-3-  
209 acetic acid, IAA), known to be transported by some members of ABC family (Geisler et al.,  
210 2005), was not affected by expression of *GFP-MtABCG40* (Figure 3E). Reduced  $^{14}\text{C}$ -*tZ* export  
211 together with a PM localization suggests GFP-MtABCG40 plays a role in the net import of  
212 CKs. In order to further investigate its potential role in CK import, we conducted  $^{14}\text{C}$ -*tZ* uptake  
213 experiments in protoplasts transformed with *AtUBI10:GFP-MtABCG40*. As expected,  
214 *AtUBI10:GFP-MtABCG40* protoplasts imported significantly more  $^{14}\text{C}$ -*tZ* than the vector  
215 control, which had negative import rates (ie. net uptake) that was most likely due to endogenous  
216 *tZ* export systems present in tobacco protoplasts (Figure 3F). In summary, our data suggest that  
217 MtABCG40 functions as a PM importer of the active CK, *tZ*.  
218



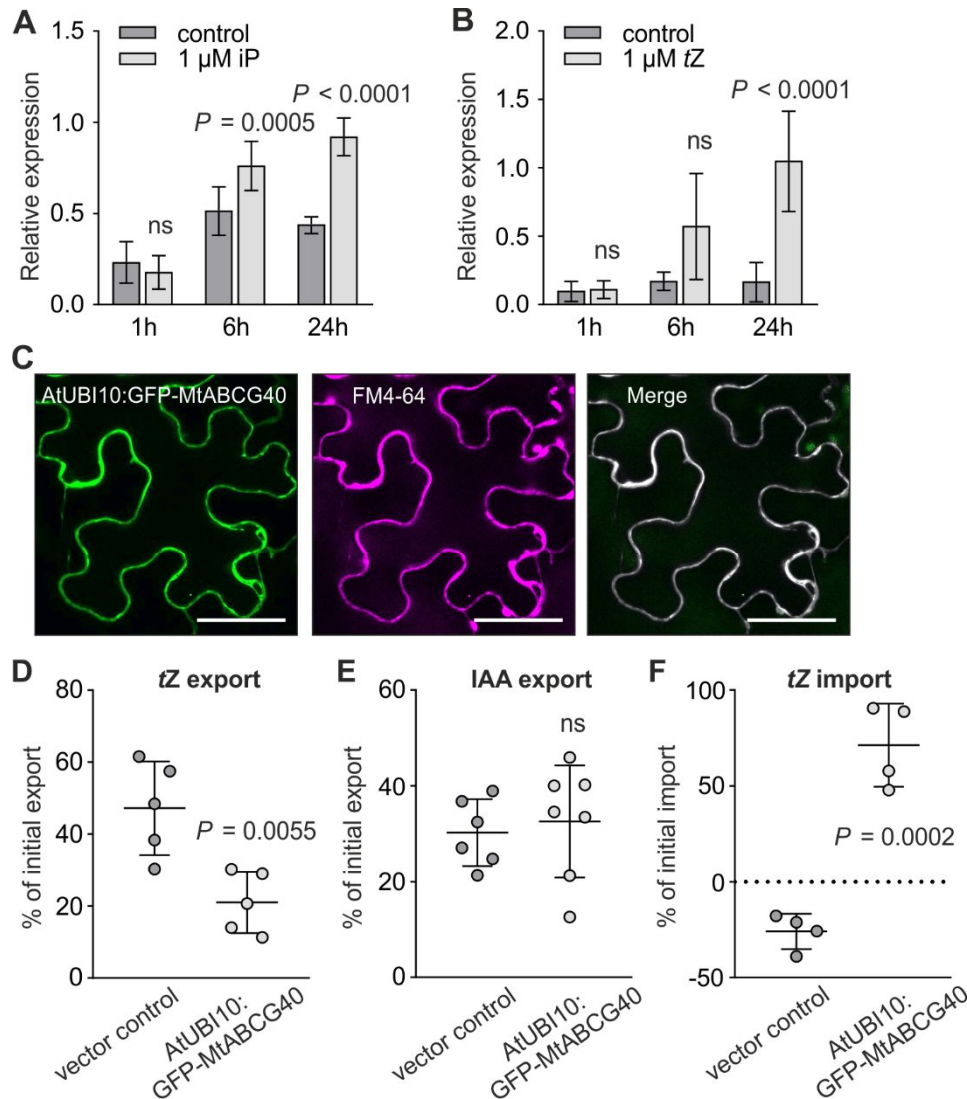

219  
220

221 **Figure 3.** MtABCG40 is a plasma membrane (PM) cytokinin (CK) importer. A and B, *MtABCG40*  
 222 expression profile upon CK treatment. Transcript levels of roots mock-treated or treated with 1 μM  
 223 isopentenyladenine (iP) (A), and 1 μM *trans*-zeatin (*tZ*) (B), measured by quantitative real-time PCR  
 224 and normalized to *actin* from *Medicago truncatula*. Data represent the mean ± SD of three independent  
 225 biological experiments and three technical repeats. Significant differences from the mock-treated plants  
 226 determined by two-tailed Student's t-test with Welch correction (A and B). C, PM localization of the  
 227 GFP-MtABCG40 fusion protein in *Agrobacterium*-infiltrated *Nicotiana benthamiana* leaf epidermal  
 228 cells with the PM marker dye, FM4-64 (Pearson's correlation coefficient, 0.75 ± 0.11). GFP and FM4-  
 229 64 images were pseudo-coloured in green and magenta, respectively. Scale bars: 50 μm. D-F, Transport  
 230 experiments in tobacco protoplasts expressing *AtUBI10:GFP-MtABCG40*. [<sup>14</sup>C]*tZ* (D) and [<sup>3</sup>H]indole-  
 231 3-acetic acid ([<sup>3</sup>H]IAA) (E) export experiments from tobacco protoplasts, as well as [<sup>14</sup>C]*tZ* import  
 232 experiments into tobacco protoplasts (F). Data represent the means ± SD from a minimum of 4  
 233 independent experiments (transfections). Significant differences from the vector control were  
 234 determined by two-tailed Student's t-test (D-F).  
 235

### 236 MtLOG3 activity affects *Medicago* root morphology upon nitrogen depletion

237 The formation of active CKs is carried out through a cleavage of the sugar component from  
 238 their monophosphate riboside forms by LOG enzymes (Kurakawa et al., 2007). Therefore, we

239 investigated a possible relationship between the *MtABCG40* and *MtLOG* and *MtLOG-like* genes  
240 under various  $\text{NH}_4\text{NO}_3$  concentrations. We found that five of these genes, namely *MtLOG2*  
241 (*Medtr1g064260*), *MtLOG3* (*Medtr1g057020*), *MtLOG-like 1* (*Medtr1g015830*), *MtLOG-like*  
242 *3* (*Medtr3g113710*) and *MtLOG-like 4* (*Medtr4g058740*) (Mortier et al., 2014; van Zeijl et al.,  
243 2015) showed increased expression under nitrogen depletion, which also positively influenced  
244 the level of *MtABCG40* mRNA (Figure 4A). We then focused our attention on the most strongly  
245 induced *LOG* gene, *MtLOG3* (van Zeijl et al., 2015), which is the closest homologue of *AtLOG7*  
246 (*AT5G06300*), a nitrogen starvation-induced gene with expression in lateral root-forming  
247 pericycle cells (Supplemental Figure S5) (Bargmann et al., 2013; Walker et al., 2017). Silencing  
248 of *MtLOG3* expression caused an increase in lateral root density (Figure 4B and Supplemental  
249 Figure S6) similar to what was observed for *MtABCG40* RNAi-silenced roots (Figure 4B and  
250 Supplemental Figure S6) and *mtabcg40* mutants (Figure 2A). This observation prompted us to  
251 investigate the *MtABCG40* and *MtLOG3* spatial expression pattern in roots. In order to do this,  
252 we generated *M. truncatula* composite plants which contained *MtABCG40* and *MtLOG3*  
253 promoters expressing either nuclear-localized versions of green fluorescent protein  
254 (*ProMtABCG40:NLS-GFP*), or tdTomato (*ProMtLOG3:NLS-tdTomato*), and  $\beta$ -glucuronidase  
255 (*ProMtABCG40:GUS* and *ProMtLOG3:GUS*) reporter genes. Transgenic roots subjected to  
256 nitrogen deficiency for three weeks revealed that *MtABCG40* expresses mainly in the root  
257 vascular tissue, a site of radial, short-distance CK translocation (Ko et al., 2014; Aubry et al.,  
258 2019), as well as in the pericycle, endodermis and, less often, in the inner cortex, layers known  
259 to be involved in initial cell divisions during lateral root primordium formation in *M. truncatula*  
260 (Herrbach et al., 2014). *MtABCG40* expression was also seen in the RAM and lateral root  
261 primordium (Figure 4C), where CKs influence meristem size and consequently organ  
262 elongation (Dello Ioio et al., 2007). In the same conditions, *MtLOG3* expression overlapped  
263 with that of *MtABCG40* in the root stele and lateral root primordium, but only bordered the  
264 regions where *MtABCG40* was expressed in the root cap (Figure 4D), a place of CK  
265 biosynthesis (Aloni et al., 2005).

266

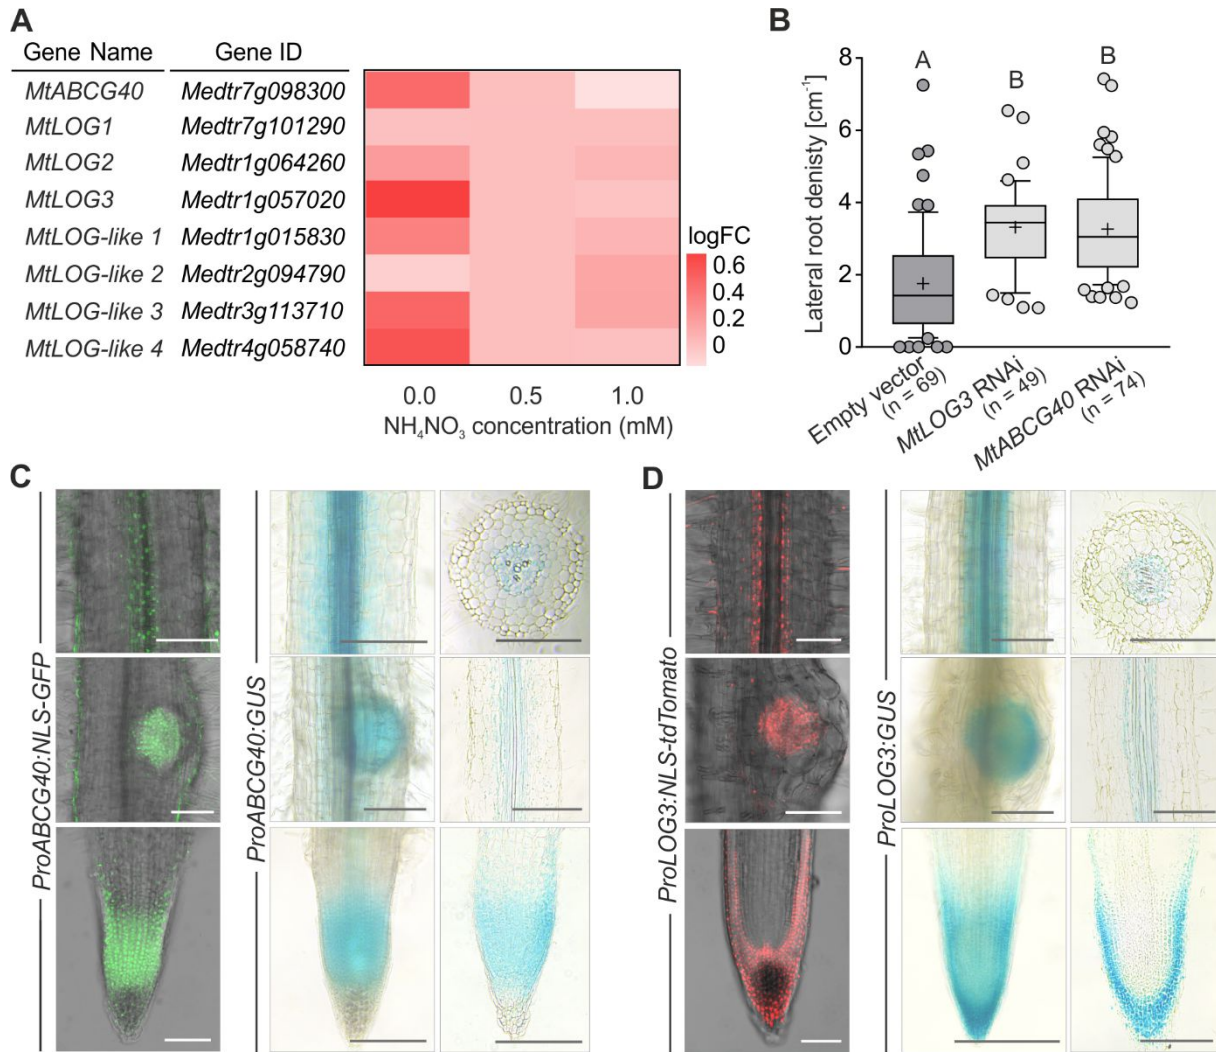

267  
268

269 **Figure 4.** *MtABCG40* and *MtLOG3* regulate root architecture upon nitrogen starvation. A, Heat map  
 270 showing the expression of *MtABCG40*, *MtLOG* and *MtLOG-like* genes in root samples across  $\text{NH}_4\text{NO}_3$   
 271 concentration. Expression is shown as log<sub>2</sub> fold changes. B, Lateral root density of *MtLOG3* or  
 272 *MtABCG40* RNAi-silenced hairy roots in comparison to the empty vector (EV)-transformed control.  
 273 For each box-and-whiskers plot: the central black line represents the median; ‘+’ represents the mean;  
 274 the box extends from the 25th to 75th percentiles; the whiskers are drawn down to the 10th percentile  
 275 and up to the 90th. Points below and above the whiskers are drawn as individual dots. Identical or  
 276 different uppercase letters indicate no or significant differences in lateral root density, respectively;  $P <$   
 277 0.05. Significant differences from the EV-transformed control determined by Kruskal-Wallis test with  
 278 a post hoc Dunn’s multiple comparison test; n represents the number of individual roots obtained from  
 279 three independent biological experiments. C-D, Tissue-specific expression of *MtABCG40* (C) and  
 280 *MtLOG3* (D) in transgenic roots carrying the *ProMtABCG40:GUS*, *ProMtABCG40:NLS-GFP* and  
 281 *ProMtLOG3:GUS*, *ProMtLOG3:NLS-tdTomato* constructs, respectively. Each panel contains images  
 282 from confocal microscopy (left side) and light microscopy with intact roots and cross-sections (right  
 283 side), including a lateral root primordium and the root apical meristem (RAM). The images are  
 284 representative of  $n > 20$  roots from three independent experiments (transformations).  
 285

## 286 Cytokinin response in the root apical meristem is inhibited by *MtABCG40*

287 It is well documented that CKs decrease the size of RAM (Dello Ioio et al., 2007; Dello Ioio et  
 288 al., 2008). To explain the changes in root length between WT and *mtabcg40* plants (Figure 2B),

289 we analyzed the sizes of their RAM as the distance between the quiescent center (QC) and the  
290 transition zone (TZ). The *mtabcg40* mutants exhibited shorter RAMs compared to WT (Figures  
291 5, A and B). Additionally, the negative role of MtABCG40 in CK responses in the root tip was  
292 demonstrated by the higher expression of *MtRR4*, a type-A CK response regulator (Gonzalez-  
293 Rizzo et al., 2006), in the root meristem of *mtabcg40-1* compared to the control (Figure 5C).  
294 Notably, there was no difference in the overall active CK content within those RAMs (Figure  
295 5D), suggesting that the distribution of active CKs rather than their total concentration is  
296 affected by loss of *MtABCG40*. Bearing in mind that CKs often antagonize auxin outcomes in  
297 meristematic regions, we measured the amount of auxin (IAA) in the RAMs of *mtabcg40* lines  
298 and observed its increased level compared to the control (Figure 5E). Moreover, we observed  
299 an upregulation of the *DR5* auxin-response reporter in RAMs of *MtABCG40* RNAi-silenced  
300 roots (Figure 5F).

301

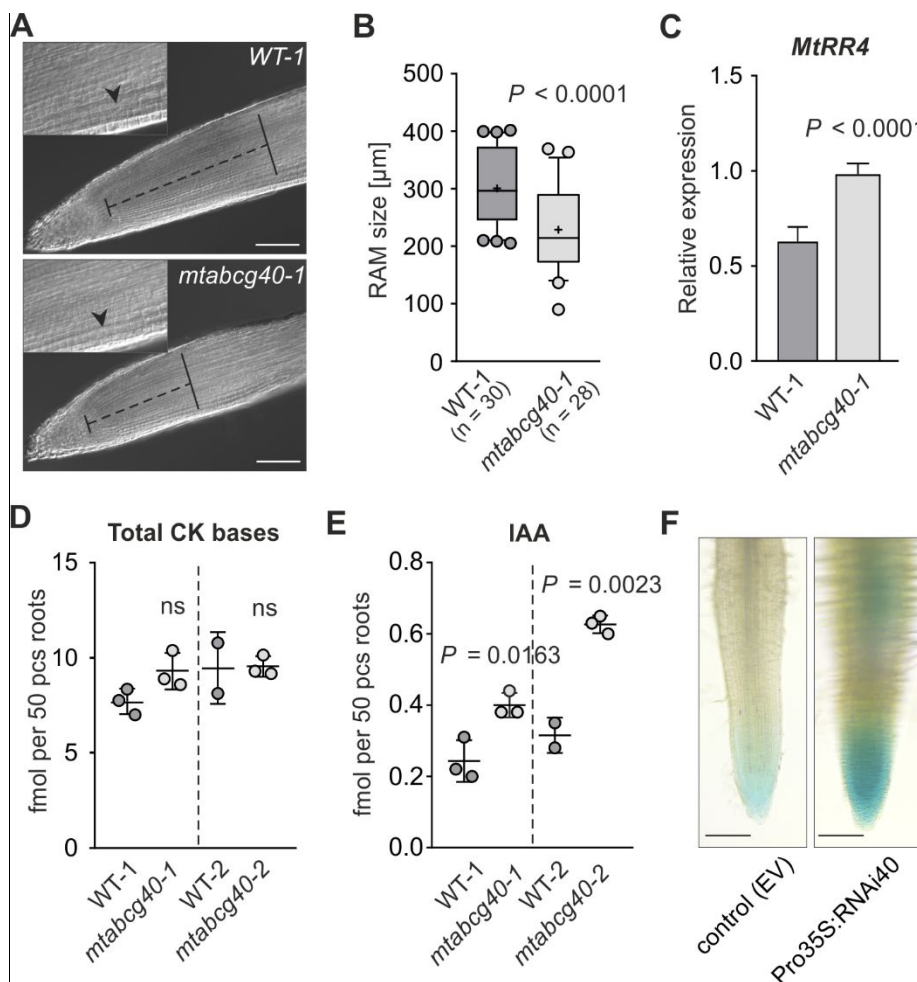

302

303

304 **Figure 5.** Mutation of *MtABCG40* reduces the size of the *Medicago truncatula* root apical meristem  
305 (RAM) upon nitrogen deficiency. A and B, Comparison of the size of RAM between WT-1 and  
306 *mtabcg40-1* mutant. Nomarski image of the RAM and apical region of the elongation/differentiation  
307 zone (EDZ) of a primary root 10 days after germination (dag). The size of the RAM (black dotted line)  
308 was determined as the distance from the quiescent center (QC) to the EDZ. The apical border of the  
309 EDZ was defined by the first elongated cortical cell of the second cortical layer (arrowhead) (A). Graph  
310 showing the RAM size of *mtabcg40-1* mutant and WT-1. For each box-and-whiskers plot: the central  
311 black line represents the median; '+' represents the mean; the box extends from the 25th to 75th  
312 percentiles; the whiskers are drawn down to the 10th percentile and up to the 90th. Points below and  
313 above the whiskers are drawn as individual dots; n represents the number of analyzed RAMs (B). C and  
314 D, Assessment of the level of CK response and cytokinin (CK) bases (*trans*-zeatin, *cis*-zeatin,  
315 isopentenyladenine, dihydrozeatin) in RAMs of WT-1 and *mtabcg40-1* mutant. Expression analysis of  
316 *MtRR4*, a type-A response regulator, in *mtabcg40-1* and WT-1. Transcript levels were measured by  
317 quantitative real-time PCR and normalized to *actin* (C). CK concentration in *mtabcg40-1* and WT-1 (D).  
318 E and F, Assessment of auxin (indole-3-acetic acid, IAA) level and response in RAMs of WT-1 and the  
319 *mtabcg40-1* mutant. IAA concentration in *mtabcg40-1* and WT-1 (E). *DR5::GUS* reporter expression in  
320 *MtABCG40* RNAi-silenced and control (EV) roots, representative images from 10 roots of each  
321 construct (F). Data represent the mean  $\pm$  SD of two independent biological experiments (B), three  
322 independent biological experiments and three technical repeats (C), and two or three biological  
323 replicates (D and E). Significant differences from the control plants determined by two-tailed Student's  
324 t-test (B-E); ns, not significant.  
325

### 326 **Initial cell divisions in lateral root formation are enhanced in *mtabcg40* plants**

327 To further explore the phenomenon of increased lateral root number in *mtabcg40* plants (Figure  
328 2C), we used gravitropic stimulation of lateral root initiation (Supplemental Figure S7)  
329 combined with an EdU (5-ethynyl-2'-deoxyuridine)-staining of DNA in dividing cells (Schiessl  
330 et al., 2019). We observed a higher number of cells in lateral root primordia forming on 12-  
331 hour gravistimulated roots on *mtabcg40-1* plants compared to control plants (Figure 6, A and  
332 B). Since CKs antagonize an auxin-dependent initiation of early cell divisions during lateral  
333 root primordium formation (Laplaze et al., 2007), we decided to assess a possible influence of  
334 *MtABCG40* on auxin response. We initially examined the expression of *MtABCG40* upon auxin  
335 (IAA) treatment and observed its repression (Figure 6C). Furthermore, by using once again  
336 gravitropic stimulation of lateral root initiation, we assessed the transcript level of auxin-  
337 inducible gene *LATERAL ORGAN BOUNDARIES DOMAIN16* (*MtLBD16*), belonging to *LOB-*  
338 *DOMAIN PROTEIN* family, which is a marker of an onset of lateral root organogenesis  
339 (Schiessl et al., 2019). We found that *MtLBD16* mRNA accumulation is enhanced in the  
340 *mtabcg40* roots compared to the WT control (Figure 6D).

341

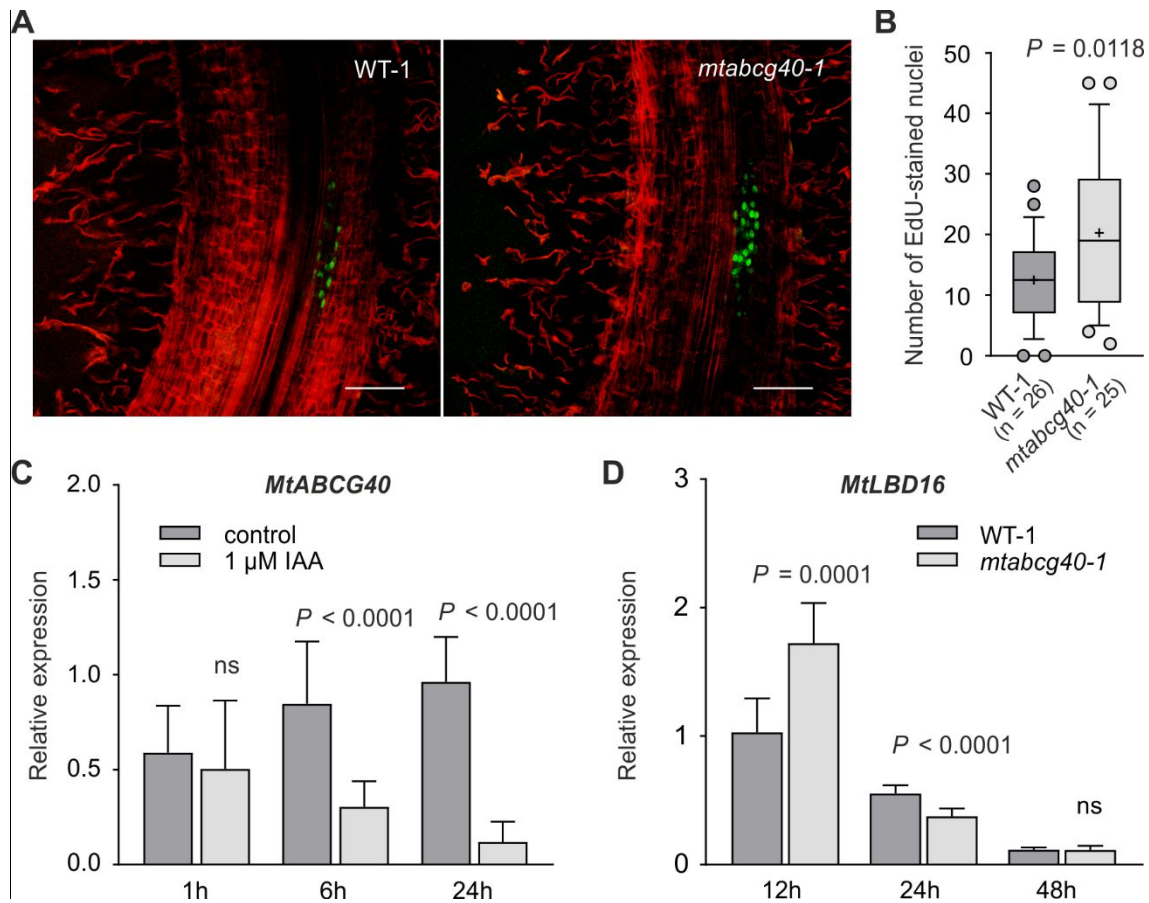

342  
343

344 **Figure 6.** Mutation of *MtABCG40* accelerates cell division within lateral root primordium. A and B,  
345 Comparison of cell division rate within lateral root primordium between WT-1 and the *mtabcg40-1*  
346 mutant. Optical sections of lateral root primordium 12 hours post induction (hpi) by gravitropic  
347 stimulation. Red propidium iodide demarks cell walls and green EdU-labeled nuclei DNA replication.  
348 Scale bars: 100  $\mu$ m (A). Comparison of the number of EdU-stained nuclei within lateral root primordium  
349 between WT-1 and the *mtabcg40-1* mutant; n represents the number of individual plants obtained from  
350 two independent experiments; for each box-and-whiskers plot: the central black line represents the  
351 median; '+' represents the mean; the box extends from the 25th to 75th percentiles; the whiskers are  
352 drawn down to the 10th percentile and up to the 90th. Points below and above the whiskers are drawn  
353 as individual dots (B). C, Transcript level of *MtABCG40* in roots that were mock-treated or treated with  
354 1  $\mu$ M indole-3-acetic acid (IAA). D, Expression analysis of *MtLBD16* in *mtabcg40-1* and WT-1.  
355 Transcript levels measured by quantitative real-time PCR and normalized to *actin*; data represent the  
356 mean  $\pm$  SD of three independent biological experiments and three technical repeats (C and D).  
357 Significant differences from the control plants determined by two-tailed Student's t-test with Welch  
358 correction (B), two-tailed Mann-Whitney test (C) or two-tailed Student's t-test (D); ns, not significant.  
359

360

### **MtABCG40 inhibits the initial stages of nodule formation**

361 *MtABCG40* is present both in nodules and in the root (Figure 1A). Its promoter activity in  
362 nodules was confirmed by an analysis of tissue-specific expression pattern during nodulation  
363 (Figure 7A). Transcriptomic data from Schiessl et al. (2019) showed a suppression of  
364 *MtABCG40* during the onset of both lateral root and nodule organogenesis (Supplemental  
365 Figure S8). Our results showed that this was related to the inhibitory influence of the transporter  
366 on lateral root initiation (Figure 6), thus we also examined the role of *MtABCG40* in the early

367 stages of nodulation. We initially assessed the response of *MtABCG40* to Nod factors (NFs).  
368 The latter are produced by the bacterial microsymbiont as a part of a chemical dialogue with  
369 plant roots in nitrogen-deprived conditions, which initiates nodule formation (Zuanazzi et al.,  
370 1998). We inoculated the roots of *M. truncatula* with suspensions of two strains of symbiotic  
371 bacteria: *S. meliloti* E65, which constitutively overproduces NFs, and, as a control, *S. meliloti*  
372 SL44 which is unable to produce NFs. We found that *MtABCG40* was induced 24 h after  
373 inoculation with *S. meliloti* E65 (Figure 7B). To quantify the effect of *MtABCG40* on  
374 nodulation, we counted the nodule number of *mtabcg40* plants. Both mutant lines (*mtabcg40-*  
375 *1* and *mtabcg40-2*) produced more nodules than their respective wild types, implying that  
376 *MtABCG40* plays a negative role in nodule formation (Figure 7C). To find out if the transporter  
377 affects the initiation of nodule primordia, we used a method of bacterial spot inoculation, in  
378 which a droplet of *S. meliloti* suspension was applied onto the susceptible zone (Figure 7D).  
379 We detected an enhanced expression of *MtLBD16* in *mtabcg40-1* compared to WT-1 plants  
380 (Figure 7E). This finding was associated with a higher number of cells labelled with EdU in the  
381 *mtabcg40-1* nodule primordia in comparison to WT-1 (Figure 7, F and G). As in the case of  
382 lateral roots, these results imply that *MtABCG40* suppresses initial cell divisions in nodule  
383 formation.  
384

385

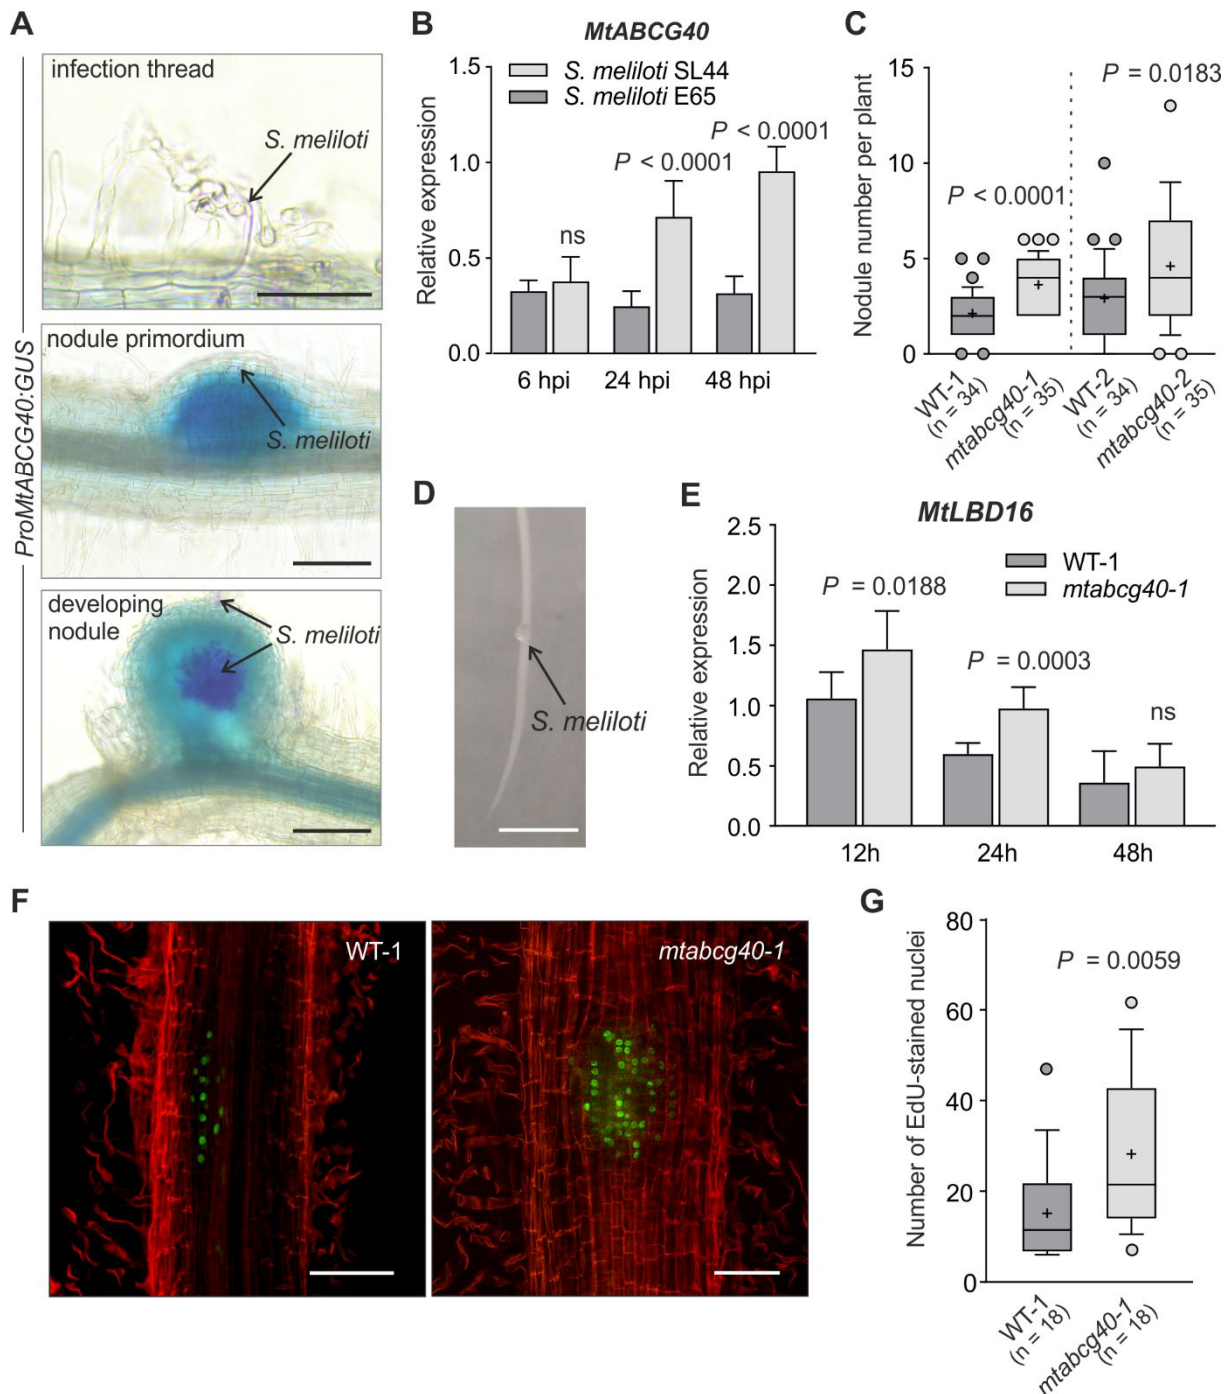

386

387 **Figure 7.** *MtABCG40* negatively influences nodule number. A, The tissue-specific expression of  
 388 *MtABCG40* during nodulation of transgenic roots carrying the *ProMtABCG40:GUS* construct. The  
 389 pictures show an infection event in the rhizodermis (top), primordium (middle) and a developing nodule  
 390 (bottom). Double staining using Magenta-Gal and X-Gluc allowed the visualization of the infecting *S.*  
 391 *meliloti* in magenta and *MtABCG40* expression in blue. The black arrows point at the infection threads  
 392 or nodule infected cells. Scale bars: 50  $\mu$ M, 100  $\mu$ M and 100  $\mu$ M, respectively. B, Comparison of  
 393 *MtABCG40* expression in roots flood-inoculated with suspensions of *S. meliloti* E65 (constitutively  
 394 overproducing Nod factors) and SL44 (unable to produce NFs). C, Nodule number formed on control  
 395 (WT) and mutant (*mtabcg40*) plants 21 days after *S. meliloti* 1021 wild-type strain inoculation. For each  
 396 box-and-whiskers plot: the central black line represents the median; '+' represents the mean; the box  
 397 extends from the 25th to 75th percentiles; the whiskers are drawn down to the 10th percentile and up to  
 398 the 90th. Points below and above the whiskers are drawn as individual dots; n represents the number of  
 399 individual plants obtained from two independent biological experiments. D-G, Analysis of auxin  
 400 response and cell division rate in spot-inoculated fragments during early stages of nodulation. A photo



401 of root spot-inoculated with a drop of *S. meliloti* suspension. Scale bar: 0.5 cm (D). Expression analysis  
402 of *MtLBD16* in *mtabcg40* and WT-1 roots (E). F and G, Comparison of the cell division rate within  
403 lateral root primordia between *mtabcg40-1* and WT-1. Optical sections of nodule primordia 12 hours  
404 post inoculation (hpi). Red propidium iodide demarks cell walls and green EdU-labeled nuclei DNA  
405 replication (F). Comparison of the number of EdU-stained nuclei within nodule primordium between  
406 WT-1 and *mtabcg40-1* mutant (G). Transcript levels measured by quantitative real-time PCR and  
407 normalized to *actin* (B and E). n represents the number of individual plants obtained from two (G) or  
408 three (C) independent experiments; for each box-and-whiskers plot: the central black line represents the  
409 median; '+' represents the mean; the box extends from the 25th to 75th percentiles; the whiskers are  
410 drawn down to the 10th percentile and up to the 90th. Points below and above the whiskers are drawn  
411 as individual dots (C and G). Significant differences from the control plants determined by two-tailed  
412 Mann–Whitney test (B, C, E and G).

413

## 414 DISCUSSION

415 Root development is a postembryonic process that is highly plastic in responding to fluctuations  
416 of nutrient levels in the environment. The change in root morphology is tightly linked to the  
417 activity of RAMs and to the formation of lateral roots, both controlled by hormonal crosstalk  
418 (Jia and von Wiren, 2020). Our studies suggested that under nitrogen shortage MtABCG40 is  
419 involved in the negative control of lateral root density (Figure 1B and 2A). The latter results  
420 from an enhanced elongation of the primary root and a decrease of lateral root number (Figure  
421 2, B and C).

422 It was previously shown that an increase of the primary root length under low nitrogen  
423 results from a reduction of CK levels in the root, and is a consequence of enhanced cell division  
424 in the RAM, their subsequent elongation, as well as their slower transition to differentiation  
425 (Dello Ioio et al., 2007; Nehnevajova et al., 2019; Wang et al., 2020). Interestingly, earlier  
426 studies suggested that CK metabolism and translocation is modulated by nitrogen status (Takei  
427 et al., 2002). We found that nitrogen shortage leads to locally increased expression of *LOG*  
428 genes in the root (Figure 4A), which is expected to promote the conversion of inactive CKs into  
429 their free, biologically active forms (Kurakawa et al., 2007). Notably, expression of *MtLOG3*  
430 was observed in the root cap (Figure 4D), a site of *de novo* CK synthesis that is known to  
431 strongly influence RAM activity in N-sufficient conditions (Tsugeki and Fedoroff, 1999; Aloni  
432 et al., 2005). The lack of an inhibitory effect of the root cap-derived CKs on RAM activity and  
433 overall root elongation under N-deficiency suggests the existence of a mechanism for reducing  
434 the sensitivity of RAM meristematic cells to this hormone. PM localization of the MtABCG40,  
435 functioning as an importer of active forms of CK and expressed in RAM cells (Figure 3 and  
436 4C), implies that the activity of this transporter may lower the concentration of apoplastic CKs  
437 in the root meristematic zone. As a consequence, CK free bases would bind less frequently to

438 the PM cytokinin receptors of RAM cells, the presence of which was recently confirmed by  
439 Kubiasova et al., (2020). This could reduce CK inhibitory effect on RAM development (Figure  
440 8). In this scenario, the role of MtABCG40 would resemble that of Arabidopsis PUP14 (Zurcher  
441 et al., 2016). This statement is strengthened by the lack of changes in the total amount of active  
442 CKs and the increased expression of *MtRR4*, a primary response marker for CK (Gonzalez-  
443 Rizzo et al., 2006) in the RAMs of *mtabcg40* in comparison to WT (Figure 5, C and D).  
444 Moreover, the potential increase of free base CKs in the apoplast of *mtabcg40* was also reflected  
445 by a shorter root tip in relation to WT (Figure 5, A and B) and led to shorter roots in the mutants  
446 (Figure 2B), which was also reported for mutants in PUP14 (Zurcher et al., 2016). Interestingly,  
447 the increase in stimulation of RAM cells by active CKs in *mtabcg40* roots was associated with  
448 an accumulation of IAA (Figure 5E) and an elevation of auxin signaling (Figure 5F). This could  
449 be due to an enhanced auxin biosynthesis, which was shown to take place after treatment with  
450 CKs (Jones et al., 2010; Yan et al., 2017), and/or a described disruptive influence of CKs on  
451 polar auxin transport (Marhavy et al., 2011). Interestingly, auxin accumulation in the reduced  
452 RAMs of *mtabcg40* is consistent with the observation of root shortening after an exogenous  
453 IAA treatment (Supplemental Figure S9).

454 Apart from the regulation of the primary root length, CK also influences lateral root  
455 development (Werner et al., 2001; To et al., 2004; Gonzalez-Rizzo et al., 2006). It was shown  
456 that CKs negatively impact auxin signaling in lateral root founder cells (LRFCs), thus  
457 perturbing their transition to mitosis and suppressing the subsequent development of lateral root  
458 primordia (Laplaze et al., 2007). Of note, CK signaling is repressed in LRFC-forming xylem  
459 pole pericycle, in contrast to neighboring cells. In the latter, CK-driven suppression of LR  
460 initiation is unhampered, thereby controlling lateral root spacing around the root radius (Chang  
461 et al., 2015). The increased number of lateral roots in *mtabcg40* (Figure 2C) implies a possible  
462 regulatory role of MtABCG40 in the control of auxin signaling during lateral root formation.  
463 The idea that MtABCG40 may influence LRFCs in *M. truncatula* is also reinforced by  
464 transcriptomic data obtained by Schiessl et al. (2019). These show, apart from an induction of  
465 auxin-responsive genes, which positively influence lateral root initiation (e.g. *MtLBD16*),  
466 suppression of *MtABCG40*, as a putative negative regulator of this process (Supplemental  
467 Figure S8). In line with this, we observed an increase of the pace of cell divisions (Figure 6, A  
468 and B) and a simultaneous enhancement of *MtLBD16* expression (Figure 6D) in *mtabcg40* roots  
469 after lateral root induction using gravi-stimulation. Of note, the aforementioned role of  
470 MtABCG40 in RAM together with suggested PM localization of CK receptors in meristematic  
471 cells does not explain the effect that this transporter exerts on the lateral root initiation. This is

472 most likely due to a potential lack of PM receptors for CKs in these differentiated stele cells  
473 (Kubiasova et al., 2020). The presence of MtABCG40 predominantly inside the root stele  
474 (Figure 4C) suggests its involvement in the inhibition of lateral root initiation, which takes place  
475 in the pericycle, endodermis and inner cortex (Herrbach et al., 2014). Since xylem vessels are  
476 the source of CKs (Osugi et al., 2017), we propose that this influence could be due to an import  
477 of CK free bases from the xylem apoplast into cells of the root stele. Moreover, prior to import  
478 by MtABCG40, the inactive CKs in the xylem should first be converted to their free bases by  
479 LOG enzymes, which are present in the root vasculature and whose activity also reduces lateral  
480 root number (Kurakawa et al., 2007) (Figure 4, B and D and Supplemental Figure S6). It can  
481 thus be proposed that during inhibition of lateral root initiation, import of active CKs into the  
482 stele cells by MtABCG40 facilitates an overall outward translocation of the hormone from the  
483 vascular vessels to the apoplast that surrounds LRFCs (Figure 8). Accordingly, the observations  
484 of an increased *MtLBD16* expression and cell number in primordia of gravistimulated *mtabcg40*  
485 roots (Figure 6) were likely the aftermath of an inhibitory effect that MtABCG40 triggers during  
486 LRFCs initial divisions rather than LR outgrowth. On the contrary, MtABCG40 function in  
487 developing lateral root primordia may resemble the cells of the RAM due to their meristematic  
488 character, in which case they may feature PM-localized CK receptors (Kubiasova et al., 2020).

489 Nodulation and lateral root formation are often considered as competing processes. This  
490 is partially due to the contrary phenotypes observed for CK-related mutants, as observed for the  
491 CK receptor *cre1* from *M. truncatula*, which features an increased nodulation and decreased  
492 lateral root formation (Gonzalez-Rizzo et al., 2006; Laffont et al., 2015). The difference likely  
493 results from the spatial changes in *MtCre1* expression from the pericycle and endodermis to the  
494 cortex which occur during the transition of the root from the non-symbiotic to symbiotic state  
495 (Boivin et al., 2016; Jardinaud et al., 2016). The latter involves production of cortical CKs as  
496 an early prerequisite for nodule initiation (Murray et al., 2007; Reid et al., 2017). Thereby,  
497 mutation of CK receptors and transporters in the cortex inhibits nodulation (Gonzalez-Rizzo et  
498 al., 2006; Jarzyniak et al., 2021). In the non-symbiotic state, MtABCG40 exerts a negative  
499 impact on lateral root number (Figure 2C) similar to MtCre1 (Gonzalez-Rizzo et al., 2006).  
500 Since both genes are expressed in the vascular bundle under non-symbiotic conditions (Boivin  
501 et al., 2016) (Figure 4C), their corresponding phenotypes imply an existence of a mechanism  
502 which utilizes vascular CKs and suppresses lateral root development. The role of CKs in this  
503 process is further supported by an increase of lateral root number after root tip removal (Lloret  
504 et al., 1988), which results in elimination of a CK source in the root and, consequently, in the  
505 xylem vessels (Aloni et al., 2006). Interestingly, root tip removal also leads to an increase of

506 nodule numbers (Nutman, 1952), which suggests that this vascular regulatory mechanism  
507 affects both organs in the same way (Figure 8). Notably, we observed an increased number of  
508 nodules, in addition to more lateral roots, in *mtabcg40* plants (Figure 7C). Mutation in  
509 *MtABCG40* also resulted in a larger number of cell divisions (Figure 7, F and G) and an  
510 increased expression of the auxin-responsive gene, *MtLBD16* (Figure 7E) in the mutant nodule  
511 primordia. Importantly, the vascular pattern of *MtABCG40* expression did not extend to cortical  
512 in response to symbiotic bacteria (Figure 7A). Moreover, *MtABCG40* was not induced quickly  
513 after bacterial inoculation (6h), but at later time points (Figure 7B). This suggests that  
514 *MtABCG40* is unlikely to be involvement in early CK signaling which promotes nodulation  
515 (Reid et al., 2017), as *MtCre1* or *MtABCG40* paralogue, *MtABCG56* (Gonzalez-Rizzo et al.,  
516 2006; Jarzyniak et al., 2021). Taken together, our results demonstrate an existence of a CK-  
517 dependent inhibitory mechanism which suppresses the initiation of nodules and lateral root  
518 formation (Figure 8). Thus, *MtABCG40* integrates well into the recently suggested  
519 developmental overlaps between these two processes (Schiessl et al., 2019).

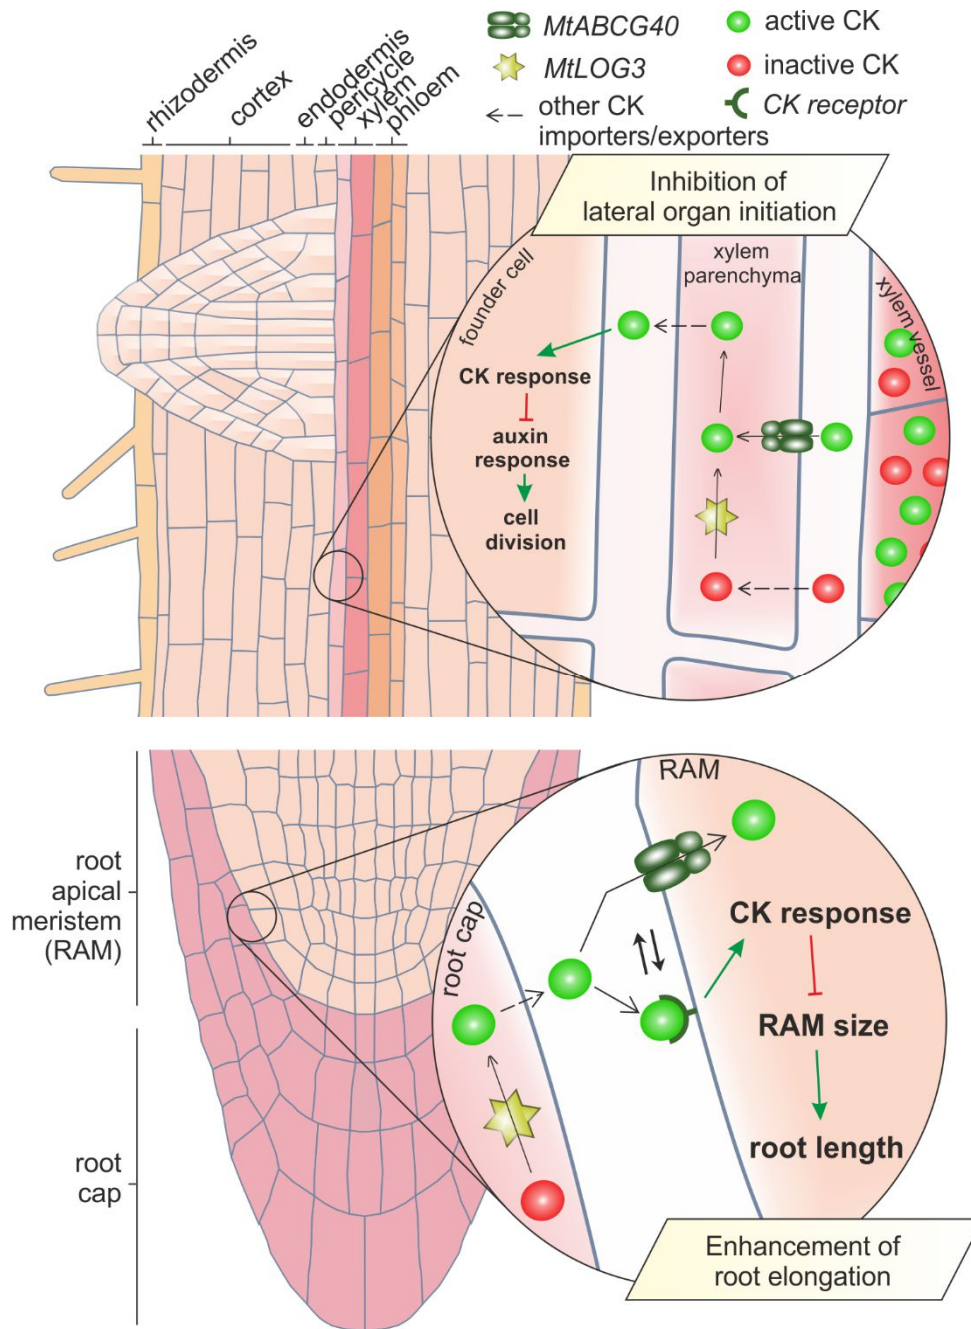

520

521 **Figure 8.** Working model for the MtABCG40 functions in the negative control of lateral root density  
 522 and nodule number in *Medicago truncatula*. In the root vascular bundles, the root cap-biosynthesized  
 523 CKs, both biologically active and inactive, are translocated through the xylem vessels towards the shoot,  
 524 due to the transpiration stream (Aloni et al., 2005). In the nitrogen-depleted environment, active CKs  
 525 are imported from the apoplast surrounding the vessels to the neighboring stele parenchyma cells by  
 526 MtABCG40. The latter contributes to the more distant translocation of the hormone to the cells of  
 527 pericycle, endodermis and inner cortex, which are known to give birth to lateral roots and nodules in *M.*  
 528 *truncatula*, suppressing their initial divisions by an inhibition of auxin response (Herrbach et al., 2014;  
 529 Xiao et al., 2014). Concomitantly, for the acquisition of the inhibitory character, inactive CKs have to  
 530 be firstly transformed by the enzyme encoded by *MtLOG3*, also expressed in the root vascular bundle,  
 531 to their active forms. In the root tip, root cap-synthesized inactive CKs (Aloni et al., 2005) are  
 532 transformed to their active forms by an enzyme encoded by *MtLOG3*. Its expression is induced in the  
 533 root cap under nitrogen deprivation. For the reduction of the sensitivity of root apical meristem (RAM)  
 534 to CK, which drives root elongation in these conditions, active CKs are imported into RAM cells from  
 535 the apoplast by a plasma membrane (PM) transporter, MtABCG40. Thereby, the hormone binds to the

536 plasma membrane CK receptors less frequently, which suppresses its characteristic outcomes, like the  
537 negative influence on the RAM size (Dello Ioio et al., 2007). This active CK pool, produced under  
538 nitrogen depletion, together with the inactive forms, is then translocated due to the transpiration stream  
539 (Aloni et al., 2005) to the lateral root and nodule-forming areas to inhibit their initiation, which translates  
540 to an increase of their spacing on the root surface.  
541

## 542 **MATERIALS AND METHODS**

### 543 **Plant materials, growth conditions, and treatments**

544 *M. truncatula Tnt1* retrotransposon insertion mutant lines, namely NF21323 (*mtabcg40-1*) and  
545 NF17891 (*mtabcg40-2*) were obtained from the Noble Research Institute. The presence of the  
546 respective insertions was confirmed using polymerase chain reaction (PCR) with *Tnt1*- and  
547 gene-specific primers (Supplemental Table S1A). The level of *MtABCG40* expression in  
548 homozygous plants was verified using quantitative reverse transcription PCR (RT-qPCR) with  
549 gene-specific primers (Supplemental Table S1A).

550 The seeds of *M. truncatula* Jemalong A17, R108, R108/DR5:GUS stable transgenic  
551 plants and *mtabcg40* plants were scarified with 96% sulfuric acid for 10 min, stratified on 0.8%  
552 agar plates for 3 days at 4°C and germinated overnight at 21°C. The seedlings were then grown  
553 in growth chambers under a 16 h light/8 h dark regime, at 22°C and 50%–60% relative  
554 humidity.

555 Rhizobial strains, namely *S. meliloti* 1021 (wild-type strain), *S. meliloti* SL44 (1021  
556 strain with deletion in the nod genes *ΔnodD1ABC*), *S. meliloti* E65 (A2101/pE65; 1021 strain  
557 containing pE65 plasmid that constitutively expresses the *nodD3* gene) and *S. meliloti*  
558 Rm1021/pXLGD4 (1021 strain containing plasmid that constitutively expresses the *lacZ* gene)  
559 were used for the inoculation of *M. truncatula*. Bacteria were grown in Bergensen's modified  
560 medium (BMM) (Rolfe et al., 1980) containing appropriate antibiotics or 3 μM luteolin (prior  
561 to spot-inoculation assays).

562 For lateral root density measurement, seedlings after germination (ABA and 6-BAP  
563 gradients), 1-week-old seedlings (IAA gradient) or 1-week-old composite plants (*MtABCG40*  
564 and *MtLOG3* RNAi silencing) grown on full-strength Fåhræus medium were transferred  
565 directly onto modified Fåhræus (Barker et al., 2006) agar plates not supplemented with  
566 nitrogen (here referred to as 0 mM NH<sub>4</sub>NO<sub>3</sub>), with different NH<sub>4</sub>NO<sub>3</sub> concentrations or full-  
567 strength Fåhræus agar plates with varying hormone contents, depending on the type of  
568 experiment. The plants were grown for one (IAA gradient), two (ABA, BAP gradients) or three  
569 (NH<sub>4</sub>NO<sub>3</sub> gradient) weeks, after which the root measurements were taken. Lateral root density  
570 was calculated by dividing the number of first order lateral roots by the length of primary root.

571 If specified, the root samples were collected and immediately frozen for expression analyses.  
572 Phenotype analyses were performed on  $\geq 28$  (28-74) roots per condition in three independent  
573 experimental repetitions. Roots from three plants were pooled for each condition in qRT-PCR  
574 analyses, in three biological replicates.

575 For the expression analyses in RAM, root apical fragments of mutant (*mtabcg40-1*) and  
576 corresponding WT plants grown for 10 days on modified Fåhreaus agar plates not supplemented  
577 with nitrogen were collected. Three independent replicates were performed with ~20 RAMs  
578 collected per sample.

579 For iP, *tZ* and IAA treatments, 7-day-old *M. truncatula* seedlings grown on solid half-  
580 strength Murashige and Skoog medium ( $\frac{1}{2}$  MS; M5524, Sigma-Aldrich) were transferred onto  
581 fresh  $\frac{1}{2}$  MS medium supplemented with 1  $\mu$ M of an appropriate hormone, dissolved in NaOH  
582 or the equal volume of NaOH (mock). For expression analyses, roots were collected and  
583 immediately frozen after 1, 6, and 24 h of treatment. Three independent replicates for each time  
584 point were performed with three roots collected per sample.

585 For *S. meliloti* inoculation assays, seedlings after germination or 3-week-old composite  
586 plants grown on full-strength Fåhreaus medium were transferred directly onto modified  
587 Fåhreaus agar plates not supplemented with nitrogen (for assessment of nodule number,  
588 expression analyses and EdU staining) or into pots (0.5 l) containing vermiculite/perlite (3:2,  
589 v/v) substrate and supplemented with N-free Fåhreaus medium, twice a week (GUS and  
590 infection thread staining). For assessments of nodule number, roots of respective 4-day-old  
591 plants were flood-inoculated with 200  $\mu$ l of *S. meliloti* 1021 strain ( $OD_{600}=0.01$ ) each and  
592 nodule numbers were counted 21 days post inoculation (dpi). For expression analyses with *S.*  
593 *meliloti* SL44 (1021 strain with deletion in the nod genes  $\Delta nodDIABC$ ) and E65 (1021 strain  
594 containing pE65 plasmid that constitutively expresses the *nodD3* gene) roots of 4-day-old  
595 Jemalong A17 plants were flood-inoculated with 200  $\mu$ l of bacterial suspension ( $OD_{600}=0.01$ ).  
596 Root samples were then collected and immediately frozen for expression analyses at the  
597 specified time points. For spot-inoculation assays, a 0.5  $\mu$ l droplet of *S. meliloti* 2011 strain  
598 ( $OD_{600}=0.02$ ) was applied on the root susceptible zone (where the root hairs appear and still  
599 elongate) of each of 3-day-old seedlings. 8-12 root fragments (2-3 mm each) comprising the  
600 spot-inoculated area were collected 12, 24, and 48 h after an application of a droplet and  
601 immediately frozen for expression analyses. Three independent biological repeats were  
602 performed. For analysis of the pace of cell divisions, analogous root fragments were stained  
603 with EdU (5-ethynyl-2'-deoxyuridine; Thermo Fisher) and modified pseudo-Schiff propidium  
604 iodide (PI), as in the case of gravity-induced lateral root initiation.

605 For GUS and infection thread staining, 200 ml of *S. meliloti* strain (OD<sub>600</sub> = 0.01) was  
606 poured onto the substrate surface (200 ml/l) containing plants grown for 1 week in N-free  
607 conditions. The root material was collected and stained 14 days after inoculation (dai).

608

### 609 **Genetic constructs and plant transformation**

610 For the analysis of tissue-specific expression pattern, 2015 bp and 2073 bp fragments upstream  
611 of ATG start codon, corresponding to the promoter regions of *MtABCG40* and *MtLOG3*,  
612 respectively, were amplified with KOD Hot Start DNA Polymerase (Novagen, Madison,  
613 Wisconsin, USA) and cloned into pDONR/Zeo (Thermo Fisher) using Gateway Recombination  
614 Cloning Technology (Reece-Hoyes and Walhout, 2018). The obtained entry clone was  
615 subsequently recombined with pKGWFS7 destination vector, containing the GUS reporter gene  
616 sequence (Karimi et al., 2002). *MtABCG40* and *MtLOG3* promoters were also amplified and  
617 cloned through ligation-independent cloning into pPLV04\_v2 (*MtABCG40:NLS-GFP*) and  
618 pPLV11\_v2 (*MtLOG3:NLS-tdTomato*), respectively, both carrying reporter genes tagged with  
619 a nuclear localization signal (SV40) (De Rybel et al., 2011).

620 For subcellular localization and transport experiments, a synthetic and codon-optimized  
621 DNA fragment (GenScript, Leiden, Netherlands) referring to a hybrid *MtABCG40* sequence,  
622 consisting of 1044 bp of gDNA and 3741 bp of cDNA, was cloned into pMDC43 vector  
623 between the *SgsI* (*AscI*) and *PacI* restriction sites (GenScript). Afterward, the 686 bp sequence  
624 of *Ubi10* promoter from *A. thaliana* (Grefen et al., 2010) was amplified and cloned into the  
625 construct (*ProUBI10:GFP-MtABCG40*), replacing the 35S promoter by restriction-ligation,  
626 using restriction sites for *PstI* and *BamHI*.

627 For RNAi silencing, a 188 bp cDNA fragment of *MtABCG40* 5'UTR or a 200 bp cDNA  
628 fragment of *MtLOG3* 3'UTR were amplified with KOD Hot Start DNA Polymerase (Novagen)  
629 and cloned into pDONR/Zeo (Thermo Fisher) using Gateway Recombination Cloning  
630 Technology. The obtained entry clone was subsequently recombined with  
631 pK7GWIWG2(II):DsRED binary vector.

632 Composite plants with transgenic roots were obtained through *Agrobacterium*  
633 *rhizogenes* Arqual-mediated transformation, described by (Boisson-Dernier et al., 2001) with  
634 modifications. Shortly, the plants after transformation were kept at 20°C on full-strength  
635 Fåhræus agar plates containing 1 mM aminoisobutyric acid. After a week, emerged and  
636 potentially non-transgenic hairy roots were removed and the plants were transferred onto fresh  
637 Fåhræus, full-strength or 0 mM NH<sub>4</sub>NO<sub>3</sub>, at 23°C for 2-3 weeks to obtain transgenic roots. The  
638 identification of transgenic roots was possible due to an antibiotic or DsRed selection,



639 depending on the vector used. At least more than 30 composite plants resulting from two or  
640 three independent transformations per construct were obtained.

641

#### 642 **MtABCG40 localisation and Transport assays**

643 For tobacco localization experiments, *ProUBI10:GFP-MtABCG40* was expressed in *N.*  
644 *benthamiana* leaf tissue by *Agrobacterium tumefaciens*-mediated leaf infiltration as described  
645 previously (Henrichs et al. 2012). For confocal laser scanning microscopy, a Leica SP5 confocal  
646 laser microscope was used and confocal settings were set to record the emission of GFP  
647 (excitation 488 nm, emission 500–550 nm) and FM4-64 (excitation 543 nm, emission 580-640  
648 nm).

649 For protoplast transport assays, protoplasts were prepared from *Agrobacterium*-  
650 transfected *N. benthamiana* leaves and [<sup>14</sup>C]*tZ* and [<sup>3</sup>H]IAA export was quantified as described  
651 previously (Henrichs et al. 2012). In short, tobacco mesophyll protoplasts were prepared 4 days  
652 after *Agrobacterium*-mediated transfection of *ProUBI10:GFP-MtABCG40* or the empty vector  
653 control. Equal protoplast loading was achieved by diffusion and export was determined by  
654 separating protoplasts and supernatants by silicon oil centrifugation. Relative export from  
655 protoplasts is calculated from exported radioactivity into the supernatant as follows:  
656 (radioactivity in the supernatant at time t = x min.) - (radioactivity in the supernatant at time t  
657 = 0)) \* (100%) / (radioactivity in the supernatant at t = 0 min.). In some cases, relative import  
658 into tobacco protoplasts was determined by separating protoplasts and supernatants by silicon  
659 oil centrifugation. [<sup>14</sup>C]*tZ* loading was calculated from imported radioactivity into protoplasts  
660 as follows: (radioactivity in the protoplasts at time t = x min.) - (radioactivity in the protoplasts  
661 at time t = 0)) \* (100%) / (radioactivity in the protoplasts at t = 0 min.); presented are mean  
662 values from 4 independent transfections and protoplasts preparations.

663

#### 664 **Microscopic observations and staining**

665 Transgenic roots carrying a GUS (*β-glucuronidase*) reporter gene were stained using 5-bromo-  
666 4-chloro-3-indolyl-*β*-D-glucuronide (Gallagher, 1992) with an addition of 20% methanol  
667 (Kosugi et al., 1990). *M. truncatula* roots inoculated with *S. meliloti* 1021 (pXLGD4) strain  
668 were stained using 5-bromo-6-chloro-3-indolyl-*β*-d-galactopyranoside (Magenta-Gal),  
669 according to the protocol described previously by Jarzyniak et al. (2021).

670 For measurement of RAM size, roots of 10-day-old plants grown on full-strength  
671 Fähræus agar plates were collected and immediately subjected to the modified pseudo-Schiff  
672 propidium iodide (PI) staining of cell walls described by (Schiessl et al., 2019). Next, the

673 material was cleared by incubation in chloral hydrate solution and mounted in Hoyer's medium  
674 according to the protocol of (Truernit et al., 2008). The length of RAMs was measured as a  
675 distance between a stem cell niche and the elongation/differentiation zone (EDZ), indicated by  
676 an onset of elongation of the second layer of cortical cells (Shen et al., 2019). The cells were  
677 visualized under Leica TCS SP5 laser scanning confocal microscope using Nomarski. The  
678 material was analyzed in two independent experiments, with more than 14 RAMs collected per  
679 one repetition.

680 For gravity-induced lateral root initiation, plants were grown vertically on full-strength  
681 Fähræus agar plates for three days, turned 135° for 12 h to constrain a growth-mediated  
682 curvature of the root, and turned back afterward to the initial orientation. Root samples,  
683 comprising 10-15 newly created <0.5 cm bents each, were collected 12, 24, and 48 h after onset  
684 of lateral root initiation and immediately frozen for expression analyses. Three independent  
685 biological repeats were performed. For analysis of the pace of cell divisions, analogous root  
686 bents were stained with EdU (5-ethynyl-2'-deoxyuridine; Thermo Fisher) and modified pseudo-  
687 Schiff propidium iodide (PI) according to the protocol described by (Schiessl et al., 2019). The  
688 samples were subsequently cleared by incubation in chloral hydrate (Sigma-Aldrich) solution  
689 and mounted in Hoyer's medium according to the protocol of (Truernit et al., 2008).  
690 Microscopic observations were carried out using Leica TCS SP5 laser scanning confocal  
691 microscope (Carl Zeiss AG, Oberkochen, Germany) with an excitation filter set at 488 nm and  
692 emission filters set to 572–625 nm and 505–600 nm for propidium iodide and EdU,  
693 respectively. Finally, the number of EdU-stained nuclei in each of the analyzed root fragments  
694 per *mtabcg40-1* and respective WT plants from two independent biological repeats was  
695 counted.

696

### 697 **Gene expression analyses**

698 The isolation of total RNA from the collected samples was performed with the use of the  
699 RNeasy Mini Kit (QIAGEN, Hilden, Germany) according to the manufacturer's instructions.  
700 Removal of the DNA from the samples was carried out through a DNase I treatment (QIAGEN).  
701 The cDNA was then synthesized with an Omniscript Reverse Transcription (RT) Kit  
702 (QIAGEN). Quantitative PCR reactions were carried out in a CFX Connect Real-time PCR  
703 detection system (BioRad, Hercules, California, USA) using iTaq Universal SYBR Green  
704 Supermix (BioRad) with at least three biological replicates each with three technical repeats.  
705 The relative mRNA expression levels were normalized to *Mtactin* and calculated using the  
706  $\Delta\Delta C_t$  method.

707

## 708 **Phytohormone quantification**

709 For CK and auxin quantification, seeds of mutant (*mtabcg40-1*, *mtabcg40-2*) and corresponding  
710 WT plants after germination were transferred onto modified Fähræus agar plates not  
711 supplemented with nitrogen. 50 RAMs of 10-day-old seedlings per sample were collected into  
712 sterile high-purity water and lyophilized. Three or two biological replicates per mutant/WT  
713 were prepared. Endogenous levels of cytokinin metabolites and IAA were determined by LC-  
714 MS/MS methods (Svacinova et al., 2012; Pencik et al., 2018). 50 RAMs were homogenized and  
715 extracted in 0.5 ml of modified Bielecki buffer (60% MeOH, 10% HCOOH and 30% H<sub>2</sub>O) with  
716 added stable isotope-labeled internal standards (0.25 pmol of CK bases, ribosides, N-  
717 glucosides, 0.5 pmol of CK O-glucosides and nucleotides, and 5 pmol of [<sup>13</sup>C<sub>6</sub>]IAA per sample).  
718 Phytohormones were determined using an ultra-high performance liquid chromatography-  
719 electrospray tandem mass spectrometry (an Acquity UPLC I-Class System coupled to a Xevo  
720 TQ-S MS, all from Waters) using stable isotope-labelled internal standards as a reference.

721

## 722 **Statistical analyses**

723 Statistical analyses were performed using the GraphPad Prism software (v.8.0). The normality  
724 assumption was verified on residuals by the usage of the Shapiro–Wilk normality test. The  
725 normal distribution of residuals from each group was analyzed separately. If the normality  
726 assumptions were met, parametric tests (i.e. two-tailed Student’s t-test, two-tailed Student’s t-  
727 test with Welch correction, one-way ANOVA with a post hoc Tukey’s multiple comparison  
728 test) were applied. If the normality assumptions were not met, non-parametric tests (i.e. two-  
729 tailed Mann–Whitney test, Kruskal-Wallis test with a post hoc Dunn’s multiple comparison  
730 test) were applied.

731

## 732 **Accession numbers**

733 The sequence data from this article can be found in Phytozome v13 database under the  
734 following accession numbers: *MtABCG40* (Medtr7g098300), *MtLOG1* (Medtr7g101290),  
735 *MtLOG2* (Medtr1g064260), *MtLOG3* (Medtr1g057020), *MtLOG-like 1* (Medtr1g015830),  
736 *MtLOG-like 2* (Medtr2g094790), *MtLOG-like 3* (Medtr3g113710), *MtLOG-like 4*  
737 (Medtr4g058740), *MtLBD16* (Medtr7g096530), *MtRR4* (Medtr5g036480), *Mtactin*  
738 (Medtr3g095530).

739

740

741 **SUPPLEMENTAL DATA**

742 **Supplemental Figure S1.** Main root length and lateral root number of *Medicago truncatula* at  
743 different concentrations of NH<sub>4</sub>NO<sub>3</sub>.

744 **Supplemental Figure S2.** Characterization of NF21323 (*mtabcg40-1*) and NF17891  
745 (*mtabcg40-2*) mutant lines of MtABCG40 used in the study.

746 **Supplemental Figure S3.** Lateral root density of control (WT) and mutant (*mtabcg40*) plants  
747 grown on media supplemented with 1 mM NH<sub>4</sub>NO<sub>3</sub>.

748 **Supplemental Figure S4.** Phylogenetic tree of full-size ABCG proteins from *Arabidopsis*  
749 *thaliana* and *Medicago truncatula* showing the close relation of MtABCG40 and MtABCG56.

750 **Supplemental Figure S5.** A heat map showing a decline in *AtLOG7* expression in the root  
751 pericycle triggered within 48 h after an addition of 5 mM NH<sub>4</sub>NO<sub>3</sub> to the nitrogen-depleted (0.3  
752 mM NH<sub>4</sub>NO<sub>3</sub>) media.

753 **Supplemental Figure S6.** Effect of *MtLOG3* and *MtABCG40* RNAi silencing on hairy root  
754 morphology under nitrogen starvation.

755 **Supplemental Figure S7.** Schematic representation of lateral root induction using gravitropic  
756 stimulation.

757 **Supplemental Figure S8.** Changes of expression of *MtABCG40* and *MtLBD16*, an auxin-  
758 responsive gene, during lateral root and nodule formation in the gravitropic stimulation and  
759 spot-inoculation assays, respectively.

760 **Supplemental Figure S9.** Primary root length of *Medicago truncatula* upon 1 μM indole-3-  
761 acetic acid (IAA) in comparison to non-treated control.

762 **Supplemental Table S1.** List of primers used in the study.

763

764 **ACKNOWLEDGEMENTS**

765 We are thankful to J. D. Murray and E. Martinoia for critical reading; T. Ostrowski and G.  
766 Framski for the provision of chemicals; D. Weijers for the pPLV11\_v02 binary vector; A. van  
767 Zeijl for *S. meliloti* 2011/pMH682; B.G. Rolfe for *S. meliloti* 1021/pHC60 strain; M.J. Barnett  
768 for *S. meliloti* A2101/pE65 strain; Sharon R. Long for *S. meliloti* Rm1021/pXLGD4.

769

770 **Funding**

771 This work was supported by the National Science Centre, Poland (grant no.  
772 2015/19/B/NZ9/03548 to M.J.), the Swiss National Funds (project 310030\_197563 to M.G.),  
773 and the ERDF project "Plants as a tool for sustainable global development" (No.  
774 CZ.02.1.01/0.0/0.0/16\_019/0000827 to O.N.).

775 **Competing Interests:** The authors declare no competing interests.

776

## 777 **Contributions**

778 M.J. devised and supervised the project. T.J. and M.J. designed the experiments and interpreted  
779 the results. T.J. performed the majority of the experiments. T.J. performed phenotypic  
780 characterization of plants, including mutants and silenced material. J.B. and T.J. performed  
781 microscopic observations (RAM length, EdU staining, promoter analyses). T.J., A.P. and K.J.  
782 generated the plasmids and performed qRT-PCR analyses. T.J. and A.P. performed plant  
783 transformation. M.G. and J.X. designed and performed transport experiments. F.R.I performed  
784 subcellular localization in *N. benthamiana* leaf epidermal cells. O.N., W.B.L. and L.P.  
785 conducted quantification of endogenous cytokinins and auxins. T.J. conducted most of the  
786 statistical analyses. T.J. and J.B. prepared figures. T.J. proposed a working model. T.J., M.J.  
787 and J.B. wrote the manuscript with the help of co-authors. All authors saw and commented on  
788 the manuscript.

789

790 The author responsible for distribution of materials integral to the findings presented in this  
791 article in accordance with the policy described in the Instructions for Authors  
792 (<https://academic.oup.com/plcell/pages/General-Instructions>) is: Michał Jasiński  
793 ([jasinski@ibch.poznan.pl](mailto:jasinski@ibch.poznan.pl)).

794

795

## 796 **REFERENCES**

- 797 Aloni R, Aloni E, Langhans M, Ullrich CI (2006) Role of cytokinin and auxin in shaping root  
798 architecture: regulating vascular differentiation, lateral root initiation, root apical dominance  
799 and root gravitropism. *Ann Bot* 97: 883-893
- 800 Aloni R, Langhans M, Aloni E, Dreieicher E, Ullrich CI (2005) Root-synthesized cytokinin in  
801 Arabidopsis is distributed in the shoot by the transpiration stream. *J Exp Bot* 56: 1535-1544
- 802 Aubry E, Dinant S, Vilaine F, Bellini C, Le Hir R (2019) Lateral transport of organic and inorganic  
803 solutes. *Plants* 8
- 804 Banasiak J, Borghi L, Stec N, Martinoia E, Jasinski M (2020) The full-size ABCG transporter of  
805 *Medicago truncatula* is involved in strigolactone secretion, affecting arbuscular mycorrhiza.  
806 *Front Plant Sci* 11: 18
- 807 Banasiak J, Jasiński M (2014) Defence, symbiosis and ABCG transporters. *In* M Geisler, ed, *Plant ABC*  
808 *Transporters*, Vol 22. Springer International Publishing, Cham, pp 163-184
- 809 Bargmann BO, Vanneste S, Krouk G, Nawy T, Efroni I, Shani E, Choe G, Friml J, Bergmann DC,  
810 Estelle M, Birnbaum KD (2013) A map of cell type-specific auxin responses. *Mol Syst Biol* 9:  
811 688
- 812 Barker DG, Pfaff T, Moreau D, Groves E, Ruffel S, Lepetit M, Whitehand S, Maillet F, Nair, R., Journet  
813 E (2006) Growing *M. truncatula*: choice of substrates and growth conditions. *In* UJ Mathesius,  
814 EP., L Sumner, eds, *The Medicago truncatula handbook*. Samuel Roberts Noble Foundation,  
815 Ardmore

- 816 Boisson-Dernier A, Chabaud M, Garcia F, Becard G, Rosenberg C, Barker DG (2001) *Agrobacterium*  
817 *rhizogenes*-transformed roots of *Medicago truncatula* for the study of nitrogen-fixing and  
818 endomycorrhizal symbiotic associations. *Molecular Plant-Microbe Interactions* 14: 695-700
- 819 Boivin S, Kazmierczak T, Brault M, Wen JQ, Gamas P, Mysore KS, Frugier F (2016) Different  
820 cytokinin histidine kinase receptors regulate nodule initiation as well as later nodule  
821 developmental stages in *Medicago truncatula*. *Plant Cell Environ* 39: 2198-2209
- 822 Chang L, Ramireddy E, Schmulling T (2015) Cytokinin as a positional cue regulating lateral root  
823 spacing in *Arabidopsis*. *J Exp Bot* 66: 4759-4768
- 824 Cornelius S, Traub M, Bernard C, Salzig C, Lang P, Mohlmann T (2012) Nucleoside transport across  
825 the plasma membrane mediated by equilibrative nucleoside transporter 3 influences metabolism  
826 of *Arabidopsis* seedlings. *Plant Biol* 14: 696-705
- 827 De Rybel B, van den Berg W, Lokerse A, Liao CY, van Mourik H, Moller B, Peris CL, Weijers D (2011)  
828 A versatile set of ligation-independent cloning vectors for functional studies in plants. *Plant*  
829 *Physiol* 156: 1292-1299
- 830 Dello Ioio R, Linhares FS, Scacchi E, Casamitjana-Martinez E, Heidstra R, Costantino P, Sabatini S  
831 (2007) Cytokinins determine *Arabidopsis* root-meristem size by controlling cell differentiation.  
832 *Curr Biol* 17: 678-682
- 833 Dello Ioio R, Nakamura K, Moubayidin L, Perilli S, Taniguchi M, Morita MT, Aoyama T, Costantino  
834 P, Sabatini S (2008) A genetic framework for the control of cell division and differentiation in  
835 the root meristem. *Science* 322: 1380-1384
- 836 Gallagher SR (1992) GUS protocols: using the GUS gene as a reporter of gene expression. Academic  
837 Press., San Diego
- 838 Geisler M, Blakeslee JJ, Bouchard R, Lee OR, Vincenzetti V, Bandyopadhyay A, Titapiwatanakun B,  
839 Peer WA, Bailly A, Richards EL, Ejenda KFK, Smith AP, Baroux C, Grossniklaus U, Muller  
840 A, Hrycyna CA, Dudler R, Murphy AS, Martinoia E (2005) Cellular efflux of auxin catalyzed  
841 by the *Arabidopsis* MDR/PGP transporter AtPGP1. *Plant J* 44: 179-194
- 842 Gonzalez-Rizzo S, Crespi M, Frugier F (2006) The *Medicago truncatula* CRE1 cytokinin receptor  
843 regulates lateral root development and early symbiotic interaction with *Sinorhizobium meliloti*.  
844 *Plant Cell* 18: 2680-2693
- 845 Grefen C, Donald N, Hashimoto K, Kudla J, Schumacher K, Blatt MR (2010) A ubiquitin-10 promoter-  
846 based vector set for fluorescent protein tagging facilitates temporal stability and native protein  
847 distribution in transient and stable expression studies. *Plant J* 64: 355-365
- 848 Gu JF, Li ZK, Mao YQ, Struik PC, Zhang H, Liu LJ, Wang ZQ, Yang JC (2018) Roles of nitrogen and  
849 cytokinin signals in root and shoot communications in maximizing of plant productivity and  
850 their agronomic applications. *Plant Science* 274: 320-331
- 851 Herrbach V, Rembliere C, Gough C, Bensmihen S (2014) Lateral root formation and patterning in  
852 *Medicago truncatula*. *J Plant Physiol* 171: 301-310
- 853 Jardinaud MF, Boivin S, Rodde N, Catrice O, Kisiala A, Lepage A, Moreau S, Roux B, Cottret L, Sallet  
854 E, Brault M, Emery RJ, Gouzy J, Frugier F, Gamas P (2016) A laser dissection-RNAseq analysis  
855 highlights the activation of cytokinin pathways by Nod factors in the *Medicago truncatula* root  
856 epidermis. *Plant Physiol* 171: 2256-2276
- 857 Jarzyniak K, Banasiak J, Jamruszka T, Pawela A, Di Donato M, Novak O, Geisler M, Jasinski M (2021)  
858 Early stages of legume-rhizobia symbiosis are controlled by ABCG-mediated transport of active  
859 cytokinins. *Nat Plants* 7: 428-436
- 860 Jia Z, von Wieren N (2020) Signaling pathways underlying nitrogen-dependent changes in root system  
861 architecture: from model to crop species. *J Exp Bot* 71: 4393-4404
- 862 Jones B, Gunneras SA, Petersson SV, Tarkowski P, Graham N, May S, Dolezal K, Sandberg G, Ljung  
863 K (2010) Cytokinin regulation of auxin synthesis in *Arabidopsis* involves a homeostatic  
864 feedback loop regulated via auxin and cytokinin signal transduction. *Plant Cell* 22: 2956-2969
- 865 Kang J, Hwang JU, Lee M, Kim YY, Assmann SM, Martinoia E, Lee Y (2010) PDR-type ABC  
866 transporter mediates cellular uptake of the phytohormone abscisic acid. *Proc Natl Acad Sci USA*  
867 107: 2355-2360
- 868 Karimi M, Inze D, Depicker A (2002) GATEWAY vectors for *Agrobacterium*-mediated plant  
869 transformation. *Trends Plant Sci* 7: 193-195
- 870 Kieber JJ, Schaller GE (2014) Cytokinins. *Arabidopsis Book* 12: e0168

- 871 Ko D, Kang J, Kiba T, Park J, Kojima M, Do J, Kim KY, Kwon M, Endler A, Song WY, Martinoia E,  
872 Sakakibara H, Lee Y (2014) Arabidopsis ABCG14 is essential for the root-to-shoot  
873 translocation of cytokinin. *Proc Natl Acad Sci U S A* 111: 7150-7155
- 874 Korobova A, Kuluev B, Mohlmann T, Veselov D, Kudoyarova G (2021) Limitation of cytokinin export  
875 to the shoots by nucleoside transporter ENT3 and its linkage with root elongation in  
876 Arabidopsis. *Cells* 10
- 877 Kosugi S, Ohashi Y, Nakajima K, Arai Y (1990) An improved assay for Beta-Glucuronidase in  
878 transformed-cells - methanol almost completely suppresses a putative endogenous Beta-  
879 Glucuronidase activity. *Plant Science* 70: 133-140
- 880 Kretzschmar T, Kohlen W, Sasse J, Borghi L, Schlegel M, Bachelier JB, Reinhardt D, Bours R,  
881 Bouwmeester HJ, Martinoia E (2012) A petunia ABC protein controls strigolactone-dependent  
882 symbiotic signalling and branching. *Nature* 483: 341-344
- 883 Kubiasova K, Montesinos JC, Samajova O, Nisler J, Mik V, Semeradova H, Plihalova L, Novak O,  
884 Marhavy P, Cavallari N, Zalabak D, Berka K, Dolezal K, Galuszka P, Samaj J, Strnad M,  
885 Benkova E, Plihal O, Spichal L (2020) Cytokinin fluoroprobe reveals multiple sites of cytokinin  
886 perception at plasma membrane and endoplasmic reticulum. *Nat Commun* 11
- 887 Kurakawa T, Ueda N, Maekawa M, Kobayashi K, Kojima M, Nagato Y, Sakakibara H, Kyojuka J  
888 (2007) Direct control of shoot meristem activity by a cytokinin-activating enzyme. *Nature* 445:  
889 652-655
- 890 Laffont C, Rey T, Andre O, Novero M, Kazmierczak T, Debelle F, Bonfante P, Jacquet C, Frugier F  
891 (2015) The CRE1 cytokinin pathway is differentially recruited depending on *Medicago*  
892 *truncatula* root environments and negatively regulates resistance to a pathogen. *Plos One* 10
- 893 Laplaze L, Benkova E, Casimiro I, Maes L, Vanneste S, Swarup R, Weijers D, Calvo V, Parizot B,  
894 Herrera-Rodriguez MB, Offringa R, Graham N, Doumas P, Friml J, Bogusz D, Beeckman T,  
895 Bennett M (2007) Cytokinins act directly on lateral root founder cells to inhibit root initiation.  
896 *Plant Cell* 19: 3889-3900
- 897 Lefevre F, Boutry M (2018) Towards identification of the substrates of ATP-binding cassette  
898 transporters. *Plant Physiol* 178: 18-39
- 899 Lima JE, Kojima S, Takahashi H, von Wiren N (2010) Ammonium triggers lateral root branching in  
900 *Arabidopsis* in an AMMONIUM TRANSPORTER1;3-dependent manner. *Plant Cell* 22: 3621-  
901 3633
- 902 Lloret PG, Casero PJ, Navascues J, Pulgarin A (1988) The effects of removal of the root-tip on lateral  
903 root distribution in adventitious roots of anion. *New Phytol* 110: 143-149
- 904 Lopez-Bucio J, Cruz-Ramirez A, Herrera-Estrella L (2003) The role of nutrient availability in regulating  
905 root architecture. *Curr Opin Plant Biol* 6: 280-287
- 906 Marhavy P, Bielach A, Abas L, Abuzeineh A, Duclercq J, Tanaka H, Parezova M, Petrasek J, Friml J,  
907 Kleine-Vehn J, Benkova E (2011) Cytokinin modulates endocytic trafficking of PIN1 auxin  
908 efflux carrier to control plant organogenesis. *Dev Cell* 21: 796-804
- 909 Miri M, Janakirama P, Huebert T, Ross L, McDowell T, Orosz K, Markmann K, Szczyglowski K (2019)  
910 Inside out: root cortex-localized LHK1 cytokinin receptor limits epidermal infection of *Lotus*  
911 *japonicus* roots by *Mesorhizobium loti*. *New Phytol* 222: 1523-1537
- 912 Mortier V, Wasson A, Jaworek P, De Keyser A, Decroos M, Holsters M, Tarkowski P, Mathesius U,  
913 Goormachtig S (2014) Role of *LONELY GUY* genes in indeterminate nodulation on *Medicago*  
914 *truncatula*. *New Phytol* 202: 582-593
- 915 Murray JD, Karas BJ, Sato S, Tabata S, Amyot L, Szczyglowski K (2007) A cytokinin perception mutant  
916 colonized by Rhizobium in the absence of nodule organogenesis. *Science* 315: 101-104
- 917 Nehnevajova E, Ramireddy E, Stolz A, Gerdemann-Knorck M, Novak O, Strnad M, Schmulling T  
918 (2019) Root enhancement in cytokinin-deficient oilseed rape causes leaf mineral enrichment,  
919 increases the chlorophyll concentration under nutrient limitation and enhances the  
920 phytoremediation capacity. *BMC Plant Biol* 19: 83
- 921 Nutman PS (1952) Studies on the physiology of nodule formation. Experiments on the excision of root-  
922 tips and nodules. *Ann Bot* 16: 79-&
- 923 Oldroyd GE, Murray JD, Poole PS, Downie JA (2011) The rules of engagement in the legume-rhizobial  
924 symbiosis. *Annu Rev Genet* 45: 119-144

- 925 Osugi A, Kojima M, Takebayashi Y, Ueda N, Kiba T, Sakakibara H (2017) Systemic transport of trans-  
926 zeatin and its precursor have differing roles in Arabidopsis shoots. *Nat Plants* 3: 17112
- 927 Pawela A, Banasiak J, Biala W, Martinoia E, Jasinski M (2019) MtABCG20 is an ABA exporter  
928 influencing root morphology and seed germination of *Medicago truncatula*. *Plant J* 98: 511-523
- 929 Pencik A, Casanova-Saez R, Pilarova V, Zukauskaitė A, Pinto R, Micol JL, Ljung K, Novak O (2018)  
930 Ultra-rapid auxin metabolite profiling for high-throughput mutant screening in Arabidopsis.  
931 *Journal of Experimental Botany* 69: 2569-2579
- 932 Postma JA, Dathe A, Lynch JP (2014) The optimal lateral root branching density for maize depends on  
933 nitrogen and phosphorus availability. *Plant Physiol* 166: 590-602
- 934 Reece-Hoyes JS, Walhout AJM (2018) Gateway Recombinational Cloning. *Cold Spring Harb Protoc*  
935 2018
- 936 Reid D, Nadzieja M, Novak O, Heckmann AB, Sandal N, Stougaard J (2017) Cytokinin biosynthesis  
937 promotes cortical cell responses during nodule development. *Plant Physiol* 175: 361-375
- 938 Rolfe BG, Gresshoff PM, Shine J (1980) Rapid screening for symbiotic mutants of rhizobium and white  
939 clover. *Plant Sci Lett* 19: 277-284
- 940 Romanov GA, Lomin SN, Schmullig T (2018) Cytokinin signaling: from the ER or from the PM? That  
941 is the question! *New Phytol* 218: 41-53
- 942 Sasaki T, Suzaki T, Soyano T, Kojima M, Sakakibara H, Kawaguchi M (2014) Shoot-derived cytokinins  
943 systemically regulate root nodulation. *Nat Commun* 5: 4983
- 944 Schiessl K, Lilley JLS, Lee T, Tamvakis I, Kohlen W, Bailey PC, Thomas A, Luptak J, Ramakrishnan  
945 K, Carpenter MD, Mysore KS, Wen J, Ahnert S, Grieneisen VA, Oldroyd GED (2019)  
946 NODULE INCEPTION recruits the lateral root developmental program for symbiotic nodule  
947 organogenesis in *Medicago truncatula*. *Curr Biol* 29: 3657-3668 e3655
- 948 Shen D, Kulikova O, Guhl K, Franssen H, Kohlen W, Bisseling T, Geurts R (2019) The *Medicago*  
949 *truncatula* nodule identity gene *MtNOOT1* is required for coordinated apical-basal development  
950 of the root. *BMC Plant Biol* 19: 571
- 951 Svacinova J, Novak O, Plackova L, Lenobel R, Holik J, Strnad M, Dolezal K (2012) A new approach  
952 for cytokinin isolation from Arabidopsis tissues using miniaturized purification: pipette tip  
953 solid-phase extraction. *Plant Methods* 8
- 954 Takei K, Takahashi T, Sugiyama T, Yamaya T, Sakakibara H (2002) Multiple routes communicating  
955 nitrogen availability from roots to shoots: a signal transduction pathway mediated by cytokinin.  
956 *J Exp Bot* 53: 971-977
- 957 Tessi TM, Brumm S, Winklbaauer E, Schumacher B, Pettinari G, Lescano I, Gonzalez CA, Wanke D,  
958 Maurino VG, Harter K, Desimone M (2021) Arabidopsis AZG2 transports cytokinins in vivo  
959 and regulates lateral root emergence. *New Phytol* 229: 979-993
- 960 To JP, Haberer G, Ferreira FJ, Deruere J, Mason MG, Schaller GE, Alonso JM, Ecker JR, Kieber JJ  
961 (2004) Type-A Arabidopsis response regulators are partially redundant negative regulators of  
962 cytokinin signaling. *Plant Cell* 16: 658-671
- 963 Traub M, Florchinger M, Piecuch J, Kunz HH, Weise-Steinmetz A, Deitmer JW, Neuhaus HE,  
964 Mohlmann T (2007) The fluorouridine insensitive 1 (*fur1*) mutant is defective in equilibrative  
965 nucleoside transporter 3 (ENT3), and thus represents an important pyrimidine nucleoside uptake  
966 system in *Arabidopsis thaliana*. *Plant J* 49: 855-864
- 967 Truernit E, Bauby H, Dubreucq B, Grandjean O, Runions J, Barthelemy J, Palauqui JC (2008) High-  
968 resolution whole-mount imaging of three-dimensional tissue organization and gene expression  
969 enables the study of Phloem development and structure in *Arabidopsis*. *Plant Cell* 20: 1494-  
970 1503
- 971 Tsugeki R, Fedoroff NV (1999) Genetic ablation of root cap cells in Arabidopsis. *Proc Natl Acad Sci*  
972 *USA* 96: 12941-12946
- 973 van Zeijl A, Op den Camp RH, Deinum EE, Charnikhova T, Franssen H, Op den Camp HJ,  
974 Bouwmeester H, Kohlen W, Bisseling T, Geurts R (2015) Rhizobium lipo-chitooligosaccharide  
975 signaling triggers accumulation of cytokinins in *Medicago truncatula* roots. *Mol Plant* 8: 1213-  
976 1226
- 977 Walker L, Boddington C, Jenkins D, Wang Y, Gronlund JT, Hulsmans J, Kumar S, Patel D, Moore JD,  
978 Carter A, Samavedam S, Bonomo G, Hersh DS, Coruzzi GM, Burroughs NJ, Gifford ML (2017)



979 Changes in gene expression in space and time orchestrate environmentally mediated shaping of  
980 root architecture. *Plant Cell* 29: 2393-2412  
981 Wang Q, Zhu Y, Zou X, Li F, Zhang J, Kang Z, Li X, Yin C, Lin Y (2020) Nitrogen deficiency-induced  
982 decrease in cytokinins content promotes rice seminal root growth by promoting root meristem  
983 cell proliferation and cell elongation. *Cells* 9  
984 Werner T, Motyka V, Strnad M, Schmulling T (2001) Regulation of plant growth by cytokinin. *Proc*  
985 *Natl Acad Sci USA* 98: 10487-10492  
986 Xiao TT, Schilderink S, Moling S, Deinum EE, Kondorosi E, Franssen H, Kulikova O, Niebel A,  
987 Bisseling T (2014) Fate map of *Medicago truncatula* root nodules. *Development* 141: 3517-  
988 3528  
989 Yan ZW, Liu X, Ljung K, Li SN, Zhao WY, Yang F, Wang ML, Tao Y (2017) Type B response  
990 regulators act as central integrators in transcriptional control of the auxin biosynthesis enzyme  
991 TAA1. *Plant Physiol* 175: 1438-1454  
992 Zhang KW, Novak OR, Wei ZY, Gou MY, Zhang XB, Yu Y, Yang HJ, Cai YH, Strnad M, Liu CJ  
993 (2014) Arabidopsis ABCG14 protein controls the acropetal translocation of root-synthesized  
994 cytokinins. *Nat Commun* 5: 3274  
995 Zhao J, Yu N, Ju M, Fan B, Zhang Y, Zhu E, Zhang M, Zhang K (2019) ABC transporter OsABCG18  
996 controls the shootward transport of cytokinins and grain yield in rice. *J Exp Bot* 70: 6277-6291  
997 Zurcher E, Liu J, di Donato M, Geisler M, Muller B (2016) Plant development regulated by cytokinin  
998 sinks. *Science* 353: 1027-1030

999

1000
